# Supplementary material for: Sight or smell? Behavioural and heart rate responses in subordinate rainbow trout exposed to cues from dominant fish
Source: PeerJ. 2015 Aug 6;3:e1169. doi: 10.7717/peerj.1169 (PMC4558064; doi:10.7717/peerj.1169)
Supplement: Supplemental Information 1 [file peerj-03-1169-s001.xls]

## Sheet: obs 1
ID	Treatment	Lenth	Weight	Sex	B-10	B-9	B-8	B-7	B-6	B-5	B-4	B-3	B-2	B-1	A+1	A+2	A+3	A+4	A+5	A+6	A+7	A+8	A+9	A+10
2	CV	21.3	92.5	f	1	1	1	1	1	1	1	1	1	1	1	1	1	1	1	1	1	1	1	2
3	CV	20.9	88.5	m	2	2	2	2	2	2	2	2	2	2	2	2	2	2	2	2	4	4	4	4
7	V	17.3	59.6	f	2	2	2	2	2	2	2	2	2	2	2	2	2	2	2	2	2	2	2	2
9	C	19.5	73	m	2	2	2	2	2	2	2	2	2	2	2	2	2	2	2	2	2	2	2	2
14	V	20.5	96.8	m	3	3	4	2	2	2	2	2	2	2	2	3	2	2	2	2	2	2	2	2
15	V	21.1	104.8	m	2	2	2	2	2	2	2	2	2	2	2	2	2	2	2	2	2	2	2	2
18	V	20.7	95.9	m	3	2	2	2	2	2	2	2	2	2	2	2	2	2	2	2	2	2	2	2
21	K	24.1	150.6		2	2	2	2	2	2	2	2	2	2	2	2	2	2	2	2	2	2	2	2
24	K	22.2	124.8		1	1	1	1	1	1	1	1	1	1	2	2	1	2	2	2	2	2	2	2
25	C	20.3	95.5	m	2	2	2	2	2	2	2	2	2	2	2	2	2	2	2	2	2	2	2	2
28	C	20.4	98.6	f	2	2	2	2	2	2	2	2	2	2	2	2	2	2	2	2	2	2	2	2
30	CV	21.5	124	m	2	2	2	2	2	2	2	2	2	2	2	2	2	2	2	2	2	2	2	2
32	C	20	90.7	f	2	2	2	2	2	2	2	2	2	2	2	2	2	2	2	2	2	2	2	2
34	V	21.3	106	f	2	2	2	2	2	2	2	2	2	2	2	2	2	2	2	2	2	2	2	3
36	V	20.5	100.4	m	2	2	2	2	2	2	2	2	2	2	2	2	2	2	2	2	2	4	2	4
38	K	19.1	75.8	f	2	2	2	2	2	2	2	2	2	2	2	2	2	2	2	2	2	2	2	2
40	V	18.4	73.1	m	2	2	2	2	2	2	2	2	2	2	2	2	2	2	2	2	2	2	2	2
41	CV	20.7	94.3	m	1	1	1	1	1	1	1	1	1	1	1	1	1	1	1	1	1	1	1	1
44	CV	19.5	80.7	m	2	2	2	2	2	2	2	2	2	2	2	2	2	2	2	2	2	2	2	2
46	K	19.6	80.2	f	2	2	2	2	2	2	4	4	3	3	3	2	2	2	4	2	2	4	3	2
48	V	19	74.5	m	2	2	2	2	2	2	2	2	2	2	2	2	2	2	2	2	2	2	2	2
50	C	17.9	63	m	2	2	2	2	2	2	2	2	2	2	3	3	3	3	2	2	2	2	3	3
51	C	17.8	59.4	m	2	2	2	2	2	2	2	2	2	2	2	2	2	2	2	2	2	2	2	2
54	CV	21.4	112.6	m	2	2	2	2	2	2	2	2	2	2	2	2	2	2	2	2	1	2	2	2
62	C	22.5	134.6	m	2	2	2	2	2	2	2	2	2	2	4	2	2	2	2	2	2	2	2	2
64	V	25.3	185.4	m	3	3	3	2	2	2	3	3	3	3	2	2	2	2	2	2	2	2	2	4
67	V	21.6	114.8	f	2	2	2	2	2	2	2	2	2	2	2	2	2	2	2	2	2	2	2	2
72	K	21.9	113.4	m	2	2	2	2	2	2	2	2	2	2	2	2	2	2	2	2	2	2	2	2
73	C	24.7	171.8	m	1	1	1	1	1	1	1	1	1	1	1	1	1	1	1	1	1	1	1	1
75	V	25	158.4	f	2	2	2	2	2	2	2	2	2	2	2	2	2	2	2	2	2	4	2	2
78	C	24.8	180.4	f	3	2	2	2	2	2	2	4	3	3	2	2	2	2	2	2	4	2	2	2
80	V	22.6	120.6	m	2	2	2	2	2	2	2	2	2	2	2	2	2	2	2	2	2	2	2	2
84	K	22.1	111.2	m	2	2	2	2	2	2	2	2	2	2	2	2	2	2	2	2	2	2	2	2
86	K	25.2	180.6	f	1	1	1	1	1	1	1	1	1	1	1	1	1	1	1	1	1	1	1	1
88	C	24.5	163.6	m	1	1	1	1	1	1	1	1	1	1	1	1	1	1	1	1	1	1	1	1
90	C	24.1	165	m	2	2	4	2	2	2	2	2	2	2	2	2	2	2	4	2	2	2	2	2
92	V	22.1	113.8	f	1	1	1	1	1	1	1	1	1	4	4	2	2	2	2	2	2	2	2	2
94	V	20.5	94.6	f	2	2	2	4	4	2	2	2	2	2	2	2	2	2	2	2	2	2	2	4
96	K	21.7	130.2	m	2	2	2	2	2	2	2	2	2	2	2	2	2	2	2	2	2	2	2	2
98	K	18.9	86.9	m	2	2	2	2	2	2	2	2	2	2	2	2	2	2	2	2	2	2	2	2
100	C	23	137.2	f	2	2	2	2	2	2	2	2	2	2	2	2	2	2	2	2	2	2	2	2
102	CV	24.9	167.8	f	2	2	2	2	2	2	2	2	2	2	2	2	2	2	2	2	4	2	2	2
103	K	27.9	230.97	f	2	2	2	2	2	2	2	2	2	2	2	2	2	2	2	2	2	2	2	4
106	CV	24.3	145.5	m	2	2	2	2	2	2	2	2	2	2	2	2	2	2	3	2	2	2	2	2
108	K	25.8	184	m	2	2	2	2	2	2	2	2	2	2	2	2	2	2	2	2	2	2	2	2
110	CV	22.6	131.6	m	2	2	2	2	2	2	2	2	2	2	2	2	2	2	2	2	2	2	2	2
113	C	22.9	129.4	m	2	2	2	2	2	2	2	2	2	2	2	2	2	2	2	2	2	2	2	2
116	CV	24.5	154.6	m	2	2	2	2	2	2	2	2	2	2	2	2	2	2	2	2	2	2	2	2
117	CV	23.9	151.2	f	3	2	2	2	2	2	2	2	2	2	2	2	2	2	2	2	2	2	2	2
120	CV	24.2	161.8	m	2	4	4	4	2	2	2	2	2	2	2	2	2	2	2	2	2	2	2	2
122	K	26.6	200.6	f	1	1	1	1	1	1	1	1	1	1	2	1	1	1	1	1	1	1	1	1
123	C	23.2	133.6	f	2	4	2	2	2	2	2	2	2	2	2	2	4	4	4	4	3	4	4	4
125	K	25.6	192	m	2	2	2	2	2	2	2	2	2	2	2	2	2	2	2	4	3	2	2	2
127	V	22.9	120.2	m	2	2	2	2	2	2	2	2	2	2	2	2	2	2	2	3	2	2	2	2
130	V	21.4	94.7	f	2	2	2	2	2	2	2	2	2	2	2	2	2	2	2	2	2	2	2	4
131	C	27.3	237.8	f	1	1	1	1	1	1	1	2	2	2	2	2	2	2	2	2	2	2	2	2
133	C	21.7	107.5	m	2	2	2	2	2	2	2	2	2	2	2	2	2	2	2	2	2	2	2	2
136	V	25.7	166.2	f	2	2	2	2	3	3	3	3	3	3	2	2	2	2	2	2	2	2	2	2
137	CV	24.6	142.2	m	2	2	2	2	2	2	2	2	2	2	2	2	2	2	2	2	2	2	2	2
142	V	27.2	192.14	f	2	2	2	2	2	2	2	2	2	2	2	2	2	2	2	2	2	2	2	2
143	K	25.9	168.25	m	2	2	2	2	2	2	2	2	2	2	2	2	2	2	2	2	2	2	2	2
145	K	26.6	208.23	f	2	2	2	2	2	2	2	2	4	4	4	2	2	2	2	2	2	2	2	2
147	CV	25	188.27	m	1	1	1	1	1	1	1	1	1	1	1	1	1	1	1	1	1	1	1	1
150	CV	25.8	173.46	f	3	3	3	3	2	3	3	3	3	3	4	2	2	2	2	2	2	2	2	2
153	C	25.3	185.27	f	2	2	2	2	2	2	2	2	2	2	2	2	2	2	2	2	2	2	2	2
156	CV	25.9	182.52	f	2	2	2	2	2	2	2	2	2	2	2	2	2	2	2	2	2	2	4	2
157	V	24.9	138.41	f	4	3	3	3	3	3	3	3	3	3	3	3	3	3	2	2	4	4	2	2
160	CV	26.4	189	f	1	1	1	1	1	1	1	1	1	1	1	1	1	1	1	1	1	1	1	1
162	K	24.6	164.17	f	2	2	2	2	2	2	2	2	2	2	2	2	2	2	2	2	2	2	2	2
164	C	25.8	186.4	m	2	2	2	2	2	2	2	2	2	2	2	2	2	2	2	2	2	2	2	2
166	V	28	244.68	m	2	2	2	2	2	2	2	2	2	2	2	2	2	2	2	2	2	2	2	2
168	K	25.6	183.73	m	2	2	2	2	2	2	2	2	2	2	2	2	2	2	2	2	2	2	2	2
170	C	26.2	193	m	2	2	2	2	2	2	2	2	2	2	2	2	2	2	2	4	2	2	2	2
172	CV	27.8	209	f	3	3	3	3	3	3	3	2	4	2	4	2	2	2	2	2	2	2	2	4
176	CV	24	136	f	2	2	2	2	2	2	2	2	2	2	2	2	2	2	2	2	2	2	2	2
177	V	25.4	175	f	2	2	2	2	2	2	2	2	2	2	2	2	2	2	2	2	2	2	2	2
179	V	25.6	183	f	1	1	1	1	1	1	1	1	1	1	1	1	1	1	1	1	1	1	1	1
182	K	25	163	f	2	2	2	2	2	2	2	2	2	2	4	2	2	2	2	2	2	2	2	2
183	K	19	84.6	m	2	2	2	2	2	2	2	2	2	2	2	2	2	2	2	2	2	2	2	2
185	C	28.1	230	m	1	1	1	2	2	1	1	1	1	1	2	2	2	2	2	2	2	2	2	2
187	V	26.8	219	m	2	2	2	2	2	2	2	2	2	2	2	2	2	4	2	2	2	2	2	2
194	CV	27.4	245	f	2	2	2	2	2	2	2	2	2	2	4	2	3	3	3	3	3	3	3	3
196	K	25	173	m	2	2	2	2	2	4	2	4	3	3	3	4	4	2	2	2	2	2	2	2

## Sheet: obs 2
ID	Treatment	Length	Weight	Sex	B-10	B-9	B-8	B-7	B-6	B-5	B-4	B-3	B-2	B-1	A+1	A+2	A+3	A+4	A+5	A+6	A+7	A+8	A+9	A+10
2	CV	21.3	92.5	f	1	1	1	1	1	1	1	1	1	1	1	1	1	1	1	1	1	1	1	1
3	CV	20.9	88.5	m	2	2	2	2	2	2	2	2	2	2	2	2	2	2	2	2	2	2	4	2
7	V	17.3	59.6	f	2	2	2	2	2	3	2	2	2	2	2	2	2	2	2	3	2	2	2	3
9	C	19.5	73	m	2	2	2	2	2	2	2	2	2	2	2	2	2	2	2	2	2	2	2	2
14	V	20.5	96.8	m	2	2	2	2	2	2	2	2	2	2	2	2	2	2	2	2	2	3	3	2
15	V	21.1	104.8	m	1	1	1	1	1	1	1	1	1	1	1	1	1	1	1	2	2	1	1	1
18	V	20.7	95.9	m	2	2	2	2	2	2	2	2	2	2	2	2	2	2	2	2	2	3	3	3
21	K	24.1	150.6		2	2	2	2	2	2	2	2	2	2	2	2	2	2	2	2	2	2	2	2
24	K	22.2	124.8		2	2	2	2	2	2	2	2	2	2	2	2	2	2	2	2	2	2	2	2
25	C	20.3	95.5	m	2	2	2	2	2	2	2	2	2	2	2	2	2	2	2	2	2	2	2	2
28	C	20.4	98.6	f	3	3	3	3	3	3	3	3	4	2	2	2	2	2	2	2	2	2	2	2
30	CV	21.5	124	m	2	2	2	2	2	2	2	2	2	2	2	2	2	2	2	2	2	2	2	2
32	C	20	90.7	f	2	2	2	2	2	2	2	2	2	2	2	2	2	3	3	3	2	2	3	2
34	V	21.3	106	f	2	2	2	2	2	2	2	2	2	2	2	2	2	2	2	2	2	2	2	2
36	V	20.5	100.4	m	2	2	2	2	1	2	2	2	2	2	2	2	2	2	2	2	2	3	2	2
38	K	19.1	75.8	f	2	2	2	2	2	2	2	2	2	2	2	2	2	2	2	3	2	2	2	2
40	V	18.4	73.1	m	3	3	3	3	3	3	3	3	2	2	2	2	2	2	2	2	2	2	2	2
41	CV	20.7	94.3	m	1	1	4	1	1	1	1	1	1	1	1	1	1	2	2	2	2	2	2	1
44	CV	19.5	80.7	m	2	2	2	2	2	2	2	2	2	2	2	2	2	2	2	2	2	2	2	2
46	K	19.6	80.2	f	2	2	2	2	2	2	2	2	4	2	2	2	2	2	4	2	4	4	2	2
48	V	19	74.5	m	2	2	2	2	2	2	2	2	2	2	2	2	2	2	2	2	2	2	2	2
50	C	17.9	63	m	2	2	2	2	2	2	2	2	2	2	2	2	2	2	2	2	2	2	2	2
51	C	17.8	59.4	m	1	1	1	1	1	1	1	1	1	1	1	1	1	1	1	1	1	1	1	1
54	CV	21.4	112.6	m	2	2	2	2	2	2	2	2	2	2	4	2	2	2	2	2	2	2	2	2
62	C	22.5	134.6	m	2	2	2	2	2	2	2	2	2	2	2	2	2	2	2	2	2	2	2	2
64	V	25.3	185.4	m	4	4	2	4	4	2	2	2	2	2	2	2	2	2	2	2	2	2	2	2
67	V	21.6	114.8	f	2	2	2	2	2	2	2	2	2	2	2	2	2	2	2	2	2	2	2	2
72	K	21.9	113.4	m	2	2	2	2	2	2	2	2	2	2	2	2	2	2	2	2	2	2	2	2
73	C	24.7	171.8	m	2	2	2	2	2	2	2	2	2	2	2	2	2	2	2	2	2	2	2	2
75	V	25	158.4	f	2	2	2	2	2	2	2	2	2	2	2	2	2	2	2	2	2	2	2	2
78	C	24.8	180.4	f	2	2	2	2	2	2	2	2	2	2	2	2	2	2	2	2	2	2	2	2
80	V	22.6	120.6	m	2	2	2	2	2	2	2	2	2	2	2	2	2	2	2	2	2	2	2	2
84	K	22.1	111.2	m	2	2	2	2	2	2	2	2	2	2	2	2	2	2	2	2	2	2	2	2
86	K	25.2	180.6	f	2	2	2	1	1	1	1	2	2	2	2	2	2	2	2	2	2	2	2	2
88	C	24.5	163.6	m	2	2	2	2	2	2	2	2	2	2	2	2	2	2	2	2	4	2	2	2
90	C	24.1	165	m	1	1	1	1	1	1	1	1	1	1	1	1	1	1	1	1	1	1	1	1
92	V	22.1	113.8	f	1	1	1	2	1	1	2	2	2	2	2	2	2	2	2	2	2	2	2	2
94	V	20.5	94.6	f	2	2	2	2	2	2	2	2	2	2	2	2	2	2	2	2	2	2	2	4
96	K	21.7	130.2	m	2	4	2	2	2	2	2	2	2	2	2	2	2	2	2	2	2	2	2	2
98	K	18.9	86.9	m	2	2	2	2	2	2	2	2	2	2	2	2	2	2	2	2	2	2	2	2
100	C	23	137.2	f	2	2	2	2	2	2	2	2	2	2	2	2	2	2	2	2	2	2	2	2
102	CV	24.9	167.8	f	2	2	2	2	2	2	2	2	2	2	2	2	2	2	2	2	2	2	2	2
103	K	27.9	230.97	f	2	2	2	2	2	2	2	2	2	2	2	2	2	2	2	2	2	2	2	2
106	CV	24.3	145.5	m	2	2	2	2	2	2	2	2	2	2	2	2	2	2	2	2	2	2	2	2
108	K	25.8	184	m	2	2	2	2	2	2	2	2	2	2	2	2	2	2	2	2	2	2	2	2
110	CV	22.6	131.6	m	2	2	2	2	2	2	2	2	2	2	2	2	2	2	2	2	2	2	2	2
113	C	22.9	129.4	m	2	2	2	2	2	2	2	2	2	2	2	2	2	2	2	2	2	2	2	2
116	CV	24.5	154.6	m	2	2	2	2	2	2	2	2	2	2	2	2	2	2	2	2	2	2	2	2
117	CV	23.9	151.2	f	2	2	2	3	2	4	2	2	2	2	4	2	2	2	3	3	3	3	2	2
120	CV	24.2	161.8	m	2	2	2	2	2	2	2	2	2	2	2	2	2	2	2	2	2	2	2	2
122	K	26.6	200.6	f	2	2	2	2	2	2	2	2	2	2	2	2	2	2	2	4	2	2	2	2
123	C	23.2	133.6	f	4	2	2	2	2	2	2	2	2	2	2	2	2	2	2	2	2	3	2	2
125	K	25.6	192	m	2	2	2	2	2	2	2	2	2	2	2	2	2	2	2	2	2	2	2	2
127	V	22.9	120.2	m	2	2	2	2	2	2	2	2	2	2	2	2	2	2	2	2	2	2	2	2
130	V	21.4	94.7	f	2	2	2	2	2	2	2	2	2	2	2	2	2	2	2	2	4	2	2	2
131	C	27.3	237.8	f	2	2	2	2	2	2	2	2	2	2	2	2	2	2	2	2	2	2	2	2
133	C	21.7	107.5	m	2	2	2	2	2	2	2	2	2	2	2	2	2	2	2	2	2	2	2	2
136	V	25.7	166.2	f	2	2	2	2	2	2	2	2	2	2	2	2	2	2	2	2	2	2	3	2
137	CV	24.6	142.2	m	2	2	2	2	2	2	2	2	2	2	2	2	2	3	2	2	2	2	3	3
142	V	27.2	192.14	f	2	2	2	2	2	2	2	2	2	2	2	2	2	2	2	2	2	2	2	2
143	K	25.9	168.25	m	2	2	2	2	2	2	2	2	2	2	2	2	4	2	2	2	2	4	2	2
145	K	26.6	208.23	f	2	2	2	2	2	2	2	2	2	2	2	2	2	2	2	2	2	4	2	2
147	CV	25	188.27	m	2	2	2	2	2	2	2	2	2	2	2	2	2	2	2	2	2	2	2	2
150	CV	25.8	173.46	f	2	2	2	2	2	2	2	2	2	2	2	2	2	2	2	2	2	2	2	2
153	C	25.3	185.27	f	2	2	2	2	2	2	2	2	2	2	2	2	2	2	2	2	2	2	2	2
156	CV	25.9	182.52	f	2	2	2	2	2	2	2	2	2	2	2	2	2	2	2	2	2	2	2	2
157	V	24.9	138.41	f	2	2	2	2	2	2	2	2	2	2	2	2	2	2	2	2	2	2	2	2
160	CV	26.4	189	f	2	2	2	2	2	2	2	2	2	2	2	2	2	2	2	2	2	2	2	2
162	K	24.6	164.17	f	2	2	2	2	2	2	2	2	2	2	2	2	2	3	2	2	2	2	2	2
164	C	25.8	186.4	m	3	3	2	3	2	3	2	2	2	2	2	2	2	2	2	2	2	2	2	2
166	V	28	244.68	m	2	2	2	2	2	2	2	2	2	2	2	2	2	2	2	2	2	2	2	2
168	K	25.6	183.73	m	2	2	2	2	2	2	2	2	2	2	2	3	3	2	3	3	3	3	2	2
170	C	26.2	193	m	2	2	2	2	2	2	2	2	2	2	2	2	2	2	2	2	2	2	2	2
172	CV	27.8	209	f	2	2	2	2	2	2	2	2	2	2	2	2	2	4	2	2	2	2	2	2
176	CV	24	136	f	2	2	2	2	2	2	2	2	2	2	2	2	2	2	2	2	2	2	2	2
177	V	25.4	175	f	2	4	4	3	2	4	2	2	2	2	2	2	2	2	2	2	2	2	2	2
179	V	25.6	183	f	1	1	1	1	1	1	1	1	1	1	1	2	2	2	2	2	2	2	2	2
182	K	25	163	f	2	2	2	2	2	2	2	2	2	2	2	2	2	2	2	2	2	2	2	2
183	K	19	84.6	m	2	2	2	2	2	2	2	2	2	2	2	2	2	2	2	2	2	2	2	2
185	C	28.1	230	m	2	2	2	2	2	2	2	2	2	2	2	2	2	2	2	2	2	2	2	2
187	V	26.8	219	m	2	2	2	2	2	2	2	2	2	2	2	2	2	2	2	2	2	2	2	2
194	CV	27.4	245	f	2	2	2	2	2	2	2	2	2	2	2	2	2	2	2	2	2	2	2	2
196	K	25	173	m	2	2	2	2	2	2	2	2	2	2	2	2	2	2	2	2	2	2	2	2

## Sheet: obs 3
ID	Treatment	Length	Weight	Sex	B-10	B-9	B-8	B-7	B-6	B-5	B-4	B-3	B-2	B-1	A+1	A+2	A+3	A+4	A+5	A+6	A+7	A+8	A+9	A+10
2	CV	21.3	92.5	f	1	1	1	1	1	1	1	1	1	1	1	1	1	1	1	1	1	1	1	1
3	CV	20.9	88.5	m	2	2	2	2	2	2	2	2	2	2	2	2	2	2	2	2	2	2	2	2
7	V	17.3	59.6	f	2	2	2	2	2	2	2	2	2	2	2	2	2	2	2	2	2	2	2	2
9	C	19.5	73	m	3	3	3	3	3	3	3	2	2	2	2	2	2	2	2	2	2	2	2	2
14	V	20.5	96.8	m	2	2	2	4	2	2	2	2	2	2	2	2	2	2	4	3	2	2	3	2
15	V	21.1	104.8	m	2	2	2	2	2	2	2	2	2	2	2	2	2	2	2	2	2	2	2	2
18	V	20.7	95.9	m	2	2	2	2	2	2	2	2	2	2	2	2	2	2	2	2	2	2	2	2
21	K	24.1	150.6		2	2	2	2	2	4	4	2	2	2	2	2	2	2	2	2	2	2	2	2
24	K	22.2	124.8		4	4	4	2	2	2	2	2	4	2	2	2	4	4	2	4	2	2	2	2
25	C	20.3	95.5	m	2	2	2	2	2	3	2	2	2	2	2	2	2	2	4	4	4	4	4	2
28	C	20.4	98.6	f	3	3	3	3	3	3	3	2	2	2	2	2	2	2	2	2	2	2	3	3
30	CV	21.5	124	m	3	3	3	3	3	3	2	2	2	2	2	2	2	2	2	2	2	2	2	2
32	C	20	90.7	f	2	2	1	1	1	1	1	1	1	1	1	2	2	2	2	2	2	2	2	2
34	V	21.3	106	f	3	3	3	3	3	3	3	3	3	3	2	3	3	3	3	3	3	3	3	3
36	V	20.5	100.4	m	4	4	3	3	3	2	2	2	2	2	4	2	2	2	2	2	4	3	4	4
38	K	19.1	75.8	f	2	2	2	2	4	2	2	2	2	2	2	2	2	2	2	2	2	2	2	2
40	V	18.4	73.1	m	2	2	2	2	2	2	2	2	2	2	2	2	2	2	2	2	2	2	2	2
41	CV	20.7	94.3	m	2	2	4	2	2	2	2	2	2	2	2	2	2	2	2	2	2	2	2	2
44	CV	19.5	80.7	m	3	3	3	3	3	3	3	3	3	3	3	3	3	3	3	3	3	3	3	3
46	K	19.6	80.2	f	2	4	2	2	2	2	2	2	2	2	2	2	2	2	2	2	2	2	2	4
48	V	19	74.5	m	2	2	2	2	2	2	2	2	2	2	2	2	2	2	2	3	2	2	2	2
50	C	17.9	63	m	2	2	2	2	2	2	2	2	2	2	2	2	2	2	2	2	2	2	3	2
51	C	17.8	59.4	m	2	1	1	1	2	1	1	1	1	1	1	1	1	1	2	1	1	1	1	1
54	CV	21.4	112.6	m	2	2	2	2	2	2	2	2	2	2	2	2	2	2	2	2	2	2	2	2
62	C	22.5	134.6	m	2	2	2	2	2	2	2	2	2	2	2	2	2	2	2	2	2	2	2	2
64	V	25.3	185.4	m	3	3	3	3	3	3	3	3	3	3	3	3	3	3	3	3	3	3	3	3
67	V	21.6	114.8	f	2	2	2	2	2	2	2	2	2	2	2	2	2	2	2	2	2	2	2	2
72	K	21.9	113.4	m	1	1	1	1	1	1	1	1	1	1	1	1	1	1	1	1	1	1	1	1
73	C	24.7	171.8	m	2	2	2	2	2	2	2	2	2	2	2	2	2	2	2	2	2	4	2	2
75	V	25	158.4	f	2	2	2	2	2	2	2	2	2	2	2	2	2	2	2	2	2	2	2	4
78	C	24.8	180.4	f	2	2	2	2	3	3	3	3	3	3	3	2	2	2	2	2	2	2	2	2
80	V	22.6	120.6	m	1	1	1	1	1	1	1	1	1	1	1	1	1	1	2	2	2	4	4	3
84	K	22.1	111.2	m	2	2	2	2	2	2	2	2	2	2	2	2	2	2	2	2	2	2	2	2
86	K	25.2	180.6	f	1	1	1	1	1	1	1	1	1	1	1	4	2	2	2	2	2	2	2	2
88	C	24.5	163.6	m	2	2	2	2	2	2	2	2	2	2	2	4	2	4	4	2	2	2	2	2
90	C	24.1	165	m	2	2	2	2	2	2	2	2	2	2	2	2	2	2	2	2	2	2	2	2
92	V	22.1	113.8	f	2	2	2	2	4	2	2	2	2	2	2	2	2	2	2	2	2	2	2	2
94	V	20.5	94.6	f	2	2	4	2	2	2	2	2	2	2	2	2	2	2	2	2	2	2	2	2
96	K	21.7	130.2	m	2	2	2	2	2	2	2	2	2	2	2	2	2	2	2	2	2	2	2	2
98	K	18.9	86.9	m	2	2	2	2	2	2	2	2	2	2	3	2	2	2	2	2	2	2	2	2
100	C	23	137.2	f	3	3	3	3	2	2	2	3	2	2	2	2	3	2	4	2	2	4	3	4
102	CV	24.9	167.8	f	2	2	2	2	2	2	2	2	2	2	2	2	2	2	2	2	2	2	2	2
103	K	27.9	230.97	f	2	2	2	2	4	2	2	2	2	2	2	2	4	2	2	2	4	4	2	2
106	CV	24.3	145.5	m	2	2	2	2	2	2	2	2	2	2	2	2	2	2	2	2	2	2	2	2
108	K	25.8	184	m	2	2	2	2	2	2	2	2	2	2	2	2	2	2	2	2	2	2	2	2
110	CV	22.6	131.6	m	2	2	2	2	2	2	2	2	2	2	2	2	2	2	2	2	2	2	2	2
113	C	22.9	129.4	m	3	3	3	3	3	3	3	3	3	3	3	3	3	3	3	3	3	3	3	3
116	CV	24.5	154.6	m	2	2	2	2	2	2	2	2	2	2	2	2	2	2	2	2	2	2	2	2
117	CV	23.9	151.2	f	2	2	2	2	2	2	2	2	2	2	4	2	2	2	2	2	2	2	2	2
120	CV	24.2	161.8	m	2	2	2	2	2	2	2	2	4	2	2	2	2	2	2	2	2	2	2	2
122	K	26.6	200.6	f	2	2	2	2	2	2	2	2	2	2	2	2	2	2	2	2	2	2	2	2
123	C	23.2	133.6	f	2	2	2	2	2	2	2	3	2	2	2	2	3	4	4	4	2	2	2	4
125	K	25.6	192	m	2	2	2	2	2	2	2	2	2	2	2	2	2	4	2	2	2	2	2	2
127	V	22.9	120.2	m	2	2	2	4	4	2	4	2	2	2	2	2	2	2	2	2	2	2	2	2
130	V	21.4	94.7	f	2	2	2	2	2	2	2	2	2	2	2	2	2	2	2	2	2	2	2	2
131	C	27.3	237.8	f	2	2	2	2	2	2	2	2	2	2	2	2	2	2	2	2	2	2	2	2
133	C	21.7	107.5	m	2	2	2	2	2	4	2	2	2	2	2	2	2	2	2	2	2	2	2	2
136	V	25.7	166.2	f	2	2	2	2	2	2	2	2	2	2	2	2	2	2	2	2	2	2	2	2
137	CV	24.6	142.2	m	2	4	2	2	2	4	2	2	2	2	2	2	2	2	2	2	2	2	3	2
142	V	27.2	192.14	f	3	3	3	3	3	3	3	3	3	3	3	3	3	3	3	3	3	3	3	3
143	K	25.9	168.25	m	2	2	2	2	2	2	2	2	2	2	2	2	2	2	2	2	2	4	4	2
145	K	26.6	208.23	f	2	2	2	2	2	2	2	2	2	2	4	4	4	4	4	4	4	4	2	2
147	CV	25	188.27	m	2	2	2	2	2	2	2	2	2	2	2	2	2	2	2	2	2	2	2	2
150	CV	25.8	173.46	f	2	2	2	2	2	2	2	2	2	2	2	2	4	2	2	2	2	2	2	2
153	C	25.3	185.27	f	2	2	2	2	2	2	2	2	2	2	2	2	2	2	2	2	2	2	2	2
156	CV	25.9	182.52	f	2	2	2	2	2	2	2	2	2	2	2	2	2	2	2	2	2	2	2	2
157	V	24.9	138.41	f	2	2	2	2	2	2	2	2	2	2	2	2	2	2	2	2	2	2	2	2
160	CV	26.4	189	f	2	2	2	2	2	2	2	2	2	2	2	2	2	2	2	2	2	2	2	2
162	K	24.6	164.17	f	2	2	2	2	2	2	2	2	2	2	2	2	2	2	2	2	2	2	2	2
164	C	25.8	186.4	m	2	2	2	2	2	2	2	2	2	2	2	2	2	2	2	2	2	2	2	2
166	V	28	244.68	m	2	2	2	2	2	2	2	2	2	2	2	2	2	2	2	2	2	2	2	2
168	K	25.6	183.73	m	2	2	2	2	2	2	2	2	2	2	2	2	2	2	2	2	2	2	2	2
170	C	26.2	193	m	2	2	2	2	2	2	2	2	2	2	2	2	2	2	2	2	2	2	2	2
172	CV	27.8	209	f	2	2	2	2	2	4	2	2	2	2	2	2	2	2	2	2	2	2	2	2
176	CV	24	136	f	1	1	1	1	1	1	1	1	1	1	1	1	1	1	1	1	1	1	1	1
177	V	25.4	175	f	2	2	2	4	2	2	2	2	2	2	2	2	2	2	2	2	2	2	2	2
179	V	25.6	183	f	4	1	1	1	4	1	1	2	2	2	4	1	4	4	4	1	1	4	4	2
182	K	25	163	f	2	2	2	2	2	2	2	2	2	2	2	4	2	2	2	2	4	4	2	2
183	K	19	84.6	m	1	1	2	1	1	1	1	2	1	1	1	2	1	1	1	1	2	2	2	2
185	C	28.1	230	m	2	2	2	2	2	2	2	2	2	2	2	2	2	2	2	2	2	2	2	2
187	V	26.8	219	m	2	2	2	2	2	2	2	2	2	2	2	2	2	2	2	2	2	2	2	2
194	CV	27.4	245	f	1	1	1	1	1	1	1	1	1	1	1	1	1	1	1	1	1	1	1	1
196	K	25	173	m	3	3	3	4	4	4	2	2	2	2	2	2	2	2	2	2	2	2	2	2
