# Supplementary material for: Sight or smell? Behavioural and heart rate responses in subordinate rainbow trout exposed to cues from dominant fish
Source: PeerJ. 2015 Aug 6;3:e1169. doi: 10.7717/peerj.1169 (PMC4558064; doi:10.7717/peerj.1169)
Supplement: Supplemental Information 2 [file peerj-03-1169-s002.xls]

## Sheet: obs 1
ID	Treatment	Length	Weight	Sex	B-10	B-9	B-8	B-7	B-6	B-5	B-4	B-3	B-2	B-1	B+1	B+2	B+3	B+4	B+5	B+6	B+7	B+8	B+9	B+10
2	CV	21.3	92.5	f	2	2	2	2	2	2	2	2	2	2	2	2	2	2	2	2	6	6	6	6
3	CV	20.9	88.5	m	3	3	3	3	3	3	1	1	1	2	2	2	4	4	4	4	4	1	2	5
7	V	17.3	59.6	f	4	4	4	4	4	4	4	4	4	4	4	4	4	3	3	3	3	3	3	3
9	C	19.5	73	m	4	4	4	4	4	4	4	4	4	3	3	4	4	4	4	4	4	4	2	4
14	V	20.5	96.8	m	3	3	6	4	4	6	6	4	6	6	6	4	4	3	6	4	3	3	3	4
15	V	21.1	104.8	m	5	6	6	6	4	4	6	3	3	3	3	4	5	6	6	6	6	6	6	6
18	V	20.7	95.9	m	6	6	6	6	6	6	6	6	6	6	6	4	4	4	6	6	6	6	6	6
21	K	24.1	150.6		6	6	4	3	3	5	3	3	3	1	3	3	3	3	3	3	3	4	4	3
24	CV	22.2	124.8		5	5	5	5	5	5	5	5	5	5	6	6	6	5	5	5	5	5	5	6
25	C	20.3	95.5	m	1	1	1	1	1	1	1	1	1	1	1	1	1	1	1	1	1	1	1	1
28	C	20.4	98.6	f	4	4	6	6	6	6	6	6	6	6	6	6	6	6	6	6	6	4	4	4
30	CV	21.5	124	m	2	2	1	4	3	2	2	2	2	2	2	2	2	2	2	2	2	2	2	2
32	C	20	90.7	f	6	6	6	6	6	4	4	4	4	1	3	4	4	4	4	6	6	5	6	6
34	V	21.3	106	f	1	1	1	1	4	4	4	4	4	4	4	4	4	2	2	4	4	4	4	6
36	V	20.5	100.4	m	1	1	2	1	2	2	2	3	2	3	3	3	2	2	2	2	2	4	3	4
38	K	19.1	75.8	f	4	4	4	4	4	4	4	4	4	4	4	4	4	4	4	4	4	4	4	4
40	V	18.4	73.1	m	2	2	1	1	1	1	2	1	1	1	2	2	2	2	2	2	2	4	4	4
41	CV	20.7	94.3	m	3	3	3	3	3	3	3	3	3	3	3	3	3	3	3	3	3	3	3	3
44	CV	19.5	80.7	m	4	4	4	4	4	4	4	4	4	5	5	6	6	6	6	6	6	6	6	6
46	K	19.6	80.2	f	2	2	6	6	6	6	1	4	1	1	1	2	3	3	3	5	5	6	6	6
48	V	19	74.5	m	5	5	5	5	5	5	5	5	5	5	5	5	5	5	5	6	6	6	6	6
50	C	17.9	63	m	4	3	3	3	4	5	6	5	5	5	4	3	1	1	6	6	5	5	4	4
51	C	17.8	59.4	m	1	1	1	1	1	1	1	1	1	1	1	1	1	1	1	1	1	1	1	1
54	CV	21.4	112.6	m	3	3	3	3	3	3	3	3	3	3	3	3	3	5	6	5	5	5	6	6
62	C	22.5	134.6	m	4	4	4	4	4	4	4	4	4	4	6	3	4	4	4	4	4	4	4	4
64	V	25.3	185.4	m	3	3	3	3	3	3	3	3	3	3	3	3	3	3	3	3	3	3	3	3
67	V	21.6	114.8	f	2	2	2	2	2	2	2	2	2	2	2	2	2	2	2	2	2	2	2	2
72	K	21.9	113.4	m	2	2	2	2	2	2	2	2	2	2	2	2	2	2	2	2	2	2	2	2
73	C	24.7	171.8	m	1	1	1	1	1	1	1	1	1	1	1	1	1	1	1	1	1	1	1	1
75	V	25	158.4	f	1	1	1	1	1	1	1	1	1	1	1	1	1	1	1	1	1	6	1	1
78	C	24.8	180.4	f	1	1	1	1	1	1	1	4	6	6	6	6	6	2	1	1	5	5	5	5
80	V	22.6	120.6	m	5	5	5	5	5	5	5	5	5	5	5	5	5	5	5	5	5	5	5	5
84	K	22.1	111.2	m	3	3	3	3	3	3	3	3	3	3	3	1	1	1	1	1	1	1	1	1
86	K	25.2	180.6	f	5	5	5	5	5	5	5	5	5	5	5	5	5	5	5	5	5	5	5	5
88	C	24.5	163.6	m	1	1	1	1	1	1	1	1	1	1	1	1	1	1	1	1	1	1	1	1
90	C	24.1	165	m	1	1	5	5	5	1	1	1	1	1	1	1	1	1	6	1	1	1	1	1
92	V	22.1	113.8	f	5	5	5	5	5	5	5	5	5	6	6	6	6	6	6	6	6	6	6	6
94	V	20.5	94.6	f	2	4	4	3	1	2	4	4	4	4	2	2	4	2	3	4	4	6	6	5
96	K	21.7	130.2	m	4	4	4	4	2	2	2	4	4	4	4	4	4	4	4	4	4	4	4	6
98	K	18.9	86.9	m	1	1	1	1	1	1	1	1	1	1	1	1	1	1	2	2	2	2	2	1
100	C	23	137.2	f	6	4	6	4	4	4	4	4	3	3	5	3	4	4	4	3	3	6	4	4
102	CV	24.9	167.8	f	5	5	5	5	5	5	5	5	5	5	5	5	5	5	5	5	4	6	6	6
103	K	27.9	230.97	f	3	3	3	3	3	3	3	3	3	3	3	3	3	3	3	3	3	3	3	3
106	CV	24.3	145.5	m	5	5	5	5	5	5	5	5	5	5	5	5	6	6	6	6	6	6	6	6
108	K	25.8	184	m	2	2	2	2	2	2	2	2	2	2	2	2	2	2	2	2	2	2	2	2
110	CV	22.6	131.6	m	4	4	4	4	4	4	2	6	4	4	4	4	4	4	4	4	2	2	2	2
113	C	22.9	129.4	m	4	4	4	6	6	6	6	6	6	6	6	6	6	6	6	6	6	6	6	6
116	CV	24.5	154.6	m	5	5	5	5	5	6	5	5	5	5	5	5	6	6	6	6	6	6	6	6
117	CV	23.9	151.2	f	4	2	2	2	2	2	2	2	2	2	6	6	6	6	6	6	6	6	6	6
120	CV	24.2	161.8	m	4	4	6	3	4	6	6	6	6	3	4	4	4	4	4	4	4	4	4	4
122	K	26.6	200.6	f	4	4	4	4	4	4	4	4	4	4	2	4	4	2	4	4	4	4	4	4
123	C	23.2	133.6	f	6	4	6	3	3	4	4	1	3	4	6	6	4	6	6	3	4	3	6	4
125	K	25.6	192	m	6	6	6	6	6	1	2	2	3	3	3	4	4	6	2	4	5	5	6	5
127	V	22.9	120.2	m	6	6	6	6	6	6	6	6	6	6	6	6	6	6	6	6	6	6	6	6
130	V	21.4	94.7	f	3	3	3	3	3	3	3	3	3	3	3	3	3	3	3	3	6	5	6	5
131	C	27.3	237.8	f	1	1	1	1	1	1	1	1	1	1	1	1	1	1	1	1	1	1	1	1
133	C	21.7	107.5	m	4	4	4	4	4	4	4	4	4	4	4	4	4	4	4	4	4	4	4	4
136	V	25.7	166.2	f	6	6	5	6	6	6	6	6	6	6	5	5	5	6	6	6	6	6	6	6
137	CV	24.6	142.2	m	6	6	6	6	6	3	5	5	5	5	5	5	5	5	5	5	6	6	6	6
142	V	27.2	192.14	f	3	4	6	3	3	4	6	3	3	3	3	6	6	5	5	6	6	6	6	6
143	K	25.9	168.25	m	1	1	1	1	1	1	2	2	1	1	1	1	1	1	1	1	1	1	1	1
145	K	26.6	208.23	f	6	6	6	6	6	6	5	6	3	1	5	1	1	1	1	1	1	1	1	1
147	CV	25	188.27	m	1	1	1	1	1	1	1	1	1	1	1	1	1	1	1	1	1	1	1	1
150	CV	25.8	173.46	f	4	4	4	4	4	4	4	4	4	4	1	2	2	3	4	4	4	4	4	3
153	C	25.3	185.27	f	6	6	6	6	6	6	6	6	6	6	6	6	6	4	4	4	4	4	4	4
156	CV	25.9	182.52	f	6	6	6	6	6	6	6	6	6	6	6	6	6	6	6	6	6	6	4	6
157	V	24.9	138.41	f	5	5	6	6	4	4	4	4	4	4	4	4	6	6	6	6	6	5	6	6
160	CV	26.4	189	f	1	1	1	1	1	1	1	1	1	1	1	1	1	1	1	1	1	1	1	1
162	K	24.6	164.17	f	5	5	6	6	6	6	6	6	6	6	6	6	6	6	6	6	6	5	5	6
164	C	25.8	186.4	m	6	6	6	6	6	6	6	6	6	6	6	5	5	5	5	5	5	5	5	5
166	V	28	244.68	m	1	1	1	1	4	4	3	3	3	3	3	4	4	4	6	6	6	6	6	6
168	K	25.6	183.73	m	2	2	2	2	2	2	2	2	2	2	6	6	6	6	6	6	6	6	6	6
170	C	26.2	193	m	6	5	6	6	6	6	5	5	5	5	4	4	4	6	4	4	5	6	6	4
172	CV	27.8	209	f	1	1	1	3	3	1	1	6	1	5	1	1	1	1	1	1	1	1	3	6
176	CV	24	136	f	4	4	4	4	6	6	6	4	4	6	6	6	6	6	6	6	6	6	6	6
177	V	25.4	175	f	1	1	1	1	1	1	1	1	1	1	1	3	3	3	3	3	3	3	3	3
179	V	25.6	183	f	2	4	4	4	4	4	4	4	4	4	4	4	4	4	4	4	4	4	4	4
182	K	25	163	f	6	6	6	6	6	6	6	6	3	3	5	5	5	5	5	5	5	5	5	5
183	K	19	84.6	m	3	3	3	3	3	3	3	3	3	3	3	3	3	3	3	3	3	3	3	3
185	C	28.1	230	m	4	4	4	4	4	4	4	4	4	4	2	2	2	2	4	4	4	4	4	2
187	V	26.8	219	m	6	6	6	6	6	6	6	6	6	6	5	5	5	5	5	5	5	5	5	5
194	CV	27.4	245	f	5	5	5	5	5	5	5	5	5	5	4	6	6	6	6	6	6	6	6	6
196	K	25	173	m	1	1	1	1	1	6	6	5	4	4	4	6	1	1	1	1	1	1	1	1

## Sheet: obs 2
ID	Treatment	Length	Weight	Sex	B-10	B-9	B-8	B-7	B-6	B-5	B-4	B-3	B-2	B-1	B+1	B+2	B+3	B+4	B+5	B+6	B+7	B+8	B+9	B+10
2	CV	21.3	92.5	f	2	2	2	2	2	2	2	2	2	2	2	2	6	6	6	6	6	6	6	6
3	CV	20.9	88.5	m	2	2	2	1	2	2	2	2	2	1	2	4	2	2	2	1	1	2	6	2
7	V	17.3	59.6	f	4	4	4	4	4	4	4	4	4	4	4	4	4	4	4	4	4	4	4	4
9	C	19.5	73	m	3	3	6	4	4	4	3	3	3	3	3	3	6	6	6	6	4	4	3	3
14	V	20.5	96.8	m	6	6	6	6	6	6	6	6	6	6	6	6	6	5	6	6	6	6	1	6
15	V	21.1	104.8	m	3	3	3	3	3	3	3	3	3	3	3	3	3	3	3	5	5	5	5	5
18	V	20.7	95.9	m	2	2	2	2	2	2	2	1	2	2	2	2	2	2	2	4	4	4	4	4
21	K	24.1	150.6		6	5	5	5	6	6	6	6	6	6	6	6	6	6	6	6	6	6	6	6
24	CV	22.2	124.8		1	3	1	3	3	1	1	1	1	3	4	1	1	3	3	3	2	2	4	4
25	C	20.3	95.5	m	2	2	2	2	2	2	2	2	2	2	2	2	2	2	2	2	2	2	2	2
28	C	20.4	98.6	f	6	6	6	6	6	6	6	6	6	5	3	3	3	3	3	3	3	3	3	4
30	CV	21.5	124	m	2	2	2	2	2	2	2	2	2	2	2	2	2	2	2	2	2	2	2	2
32	C	20	90.7	f	4	4	3	4	4	3	4	4	4	4	3	3	6	6	6	6	6	4	6	2
34	V	21.3	106	f	6	6	6	6	5	5	6	6	6	6	3	3	3	3	3	3	3	6	6	6
36	V	20.5	100.4	m	2	2	3	3	3	3	2	2	3	3	2	2	2	2	2	2	2	6	2	2
38	K	19.1	75.8	f	4	4	4	4	4	4	4	4	4	4	4	4	4	4	4	6	6	4	6	4
40	V	18.4	73.1	m	1	1	1	1	1	1	1	1	1	1	1	1	1	1	1	1	1	1	4	6
41	CV	20.7	94.3	m	1	1	5	5	5	5	5	5	5	5	5	5	5	3	4	4	4	4	6	5
44	CV	19.5	80.7	m	6	6	6	6	6	6	6	6	6	6	4	4	4	4	4	4	4	4	4	4
46	K	19.6	80.2	f	1	4	1	1	6	6	6	4	6	3	3	2	1	3	1	4	5	1	5	6
48	V	19	74.5	m	6	6	6	6	4	4	6	6	6	6	6	6	6	6	6	6	6	6	6	6
50	C	17.9	63	m	3	3	3	3	3	3	3	3	3	3	3	3	3	3	3	3	3	3	3	3
51	C	17.8	59.4	m	2	2	2	2	2	2	2	2	2	2	2	2	2	2	2	2	2	2	2	2
54	CV	21.4	112.6	m	6	6	6	6	6	6	6	6	6	6	1	2	2	4	4	3	3	3	3	4
62	C	22.5	134.6	m	4	4	4	4	4	4	4	4	4	4	4	4	4	4	4	4	4	4	4	4
64	V	25.3	185.4	m	5	5	5	3	6	3	3	3	3	3	3	3	3	3	3	3	3	3	3	3
67	V	21.6	114.8	f	2	2	2	2	2	2	2	2	2	2	2	2	2	2	2	2	2	2	2	2
72	K	21.9	113.4	m	2	1	1	1	1	1	1	1	1	1	2	2	2	2	1	1	1	2	2	2
73	C	24.7	171.8	m	1	1	1	1	1	1	1	1	1	1	1	1	1	1	1	1	1	1	1	1
75	V	25	158.4	f	1	1	1	1	1	1	1	1	1	1	1	1	1	1	1	1	1	1	1	1
78	C	24.8	180.4	f	6	6	6	6	6	6	6	6	6	6	6	6	5	6	6	6	6	5	5	3
80	V	22.6	120.6	m	3	3	5	6	4	5	6	6	5	5	5	5	5	6	6	6	5	5	5	5
84	K	22.1	111.2	m	4	4	4	4	4	4	4	4	4	4	4	4	4	4	4	4	4	4	4	4
86	K	25.2	180.6	f	6	6	6	6	6	6	6	6	6	6	1	1	1	1	1	1	3	1	1	1
88	C	24.5	163.6	m	1	1	1	1	1	1	1	1	1	1	1	1	1	1	1	1	5	1	1	1
90	C	24.1	165	m	3	3	3	3	3	3	3	3	3	3	3	1	1	1	1	1	1	1	1	1
92	V	22.1	113.8	f	6	6	6	6	6	6	4	4	4	4	4	4	4	4	4	4	4	6	6	6
94	V	20.5	94.6	f	2	2	3	3	2	2	2	2	1	1	2	2	2	2	3	3	3	4	4	4
96	K	21.7	130.2	m	3	5	6	5	5	5	5	5	5	5	5	4	3	4	4	4	4	2	2	4
98	K	18.9	86.9	m	1	1	1	1	1	1	1	1	1	1	1	1	1	1	1	1	1	6	6	6
100	C	23	137.2	f	6	6	6	6	6	5	6	6	6	6	6	6	6	5	6	6	6	6	6	6
102	CV	24.9	167.8	f	6	6	6	6	6	6	6	6	6	6	6	4	4	6	6	6	6	6	6	6
103	K	27.9	230.97	f	1	1	1	5	6	3	1	1	1	1	1	1	1	3	3	3	3	3	3	3
106	CV	24.3	145.5	m	5	5	5	5	5	5	5	5	5	5	5	6	6	5	5	5	5	5	5	5
108	K	25.8	184	m	2	2	2	2	2	2	2	2	3	3	1	1	1	1	1	1	1	1	1	1
110	CV	22.6	131.6	m	2	2	2	2	2	2	2	2	2	2	2	2	2	2	2	2	2	2	2	2
113	C	22.9	129.4	m	4	4	4	4	4	4	4	4	4	4	4	4	4	4	4	4	4	4	4	4
116	CV	24.5	154.6	m	6	4	6	6	6	4	4	4	4	4	6	6	6	6	6	6	6	6	6	6
117	CV	23.9	151.2	f	2	2	6	5	5	6	6	5	3	3	2	6	6	6	6	6	6	6	3	1
120	CV	24.2	161.8	m	4	4	4	4	4	4	4	4	4	4	4	4	4	4	4	4	4	4	4	4
122	K	26.6	200.6	f	4	4	4	6	4	4	3	4	3	3	4	3	4	3	4	6	6	6	4	3
123	C	23.2	133.6	f	6	5	6	4	4	4	4	4	4	4	4	4	3	4	4	4	6	6	6	6
125	K	25.6	192	m	6	6	6	6	6	6	6	6	6	6	6	6	6	6	6	6	6	6	6	6
127	V	22.9	120.2	m	3	3	3	3	1	3	3	3	1	1	1	1	1	1	1	1	1	1	1	3
130	V	21.4	94.7	f	4	4	4	4	4	4	4	4	4	4	4	4	4	4	4	4	6	6	6	6
131	C	27.3	237.8	f	3	3	3	3	3	3	3	3	3	3	3	3	3	3	3	3	3	3	3	3
133	C	21.7	107.5	m	4	4	4	4	4	4	4	4	4	4	4	4	4	4	4	4	4	4	4	4
136	V	25.7	166.2	f	6	6	6	6	6	6	6	6	6	6	6	6	6	5	5	5	5	5	5	5
137	CV	24.6	142.2	m	4	5	4	4	5	4	5	5	4	4	5	5	6	6	4	6	6	5	4	6
142	V	27.2	192.14	f	1	1	1	1	1	6	5	4	4	5	4	4	4	4	4	4	6	6	6	6
143	K	25.9	168.25	m	6	6	6	6	6	5	6	6	6	6	6	6	6	6	5	5	5	6	4	4
145	K	26.6	208.23	f	1	1	1	1	1	1	1	1	1	1	1	1	1	1	1	1	1	1	1	1
147	CV	25	188.27	m	1	1	1	1	1	1	1	1	1	1	1	1	1	1	1	1	1	1	1	1
150	CV	25.8	173.46	f	1	1	1	1	1	1	1	1	1	1	1	1	1	1	1	1	1	1	1	1
153	C	25.3	185.27	f	4	4	4	6	4	4	4	4	4	4	4	4	4	4	4	4	4	4	4	4
156	CV	25.9	182.52	f	6	6	6	6	6	6	6	6	6	6	6	6	6	6	6	6	6	6	6	6
157	V	24.9	138.41	f	5	5	5	5	5	5	5	5	5	5	5	5	5	5	5	5	5	5	5	5
160	CV	26.4	189	f	3	3	3	5	5	5	5	5	5	5	6	6	6	6	6	6	6	5	6	6
162	K	24.6	164.17	f	6	6	6	6	6	6	6	6	6	6	6	6	6	6	6	6	6	6	6	5
164	C	25.8	186.4	m	6	6	5	6	6	6	6	6	6	6	6	6	6	4	4	4	3	4	4	6
166	V	28	244.68	m	4	4	4	4	4	4	4	4	4	4	4	4	4	4	4	4	4	4	4	4
168	K	25.6	183.73	m	3	3	3	3	3	3	3	3	3	3	6	6	6	6	6	6	6	6	6	6
170	C	26.2	193	m	5	5	5	5	5	5	5	6	5	5	5	5	5	5	5	5	5	5	6	5
172	CV	27.8	209	f	3	3	3	3	3	3	3	3	3	3	5	5	6	5	4	5	3	6	6	1
176	CV	24	136	f	4	4	4	4	3	4	4	4	4	4	4	4	4	4	4	4	4	4	4	4
177	V	25.4	175	f	4	2	1	1	2	6	6	6	6	6	6	4	4	3	3	3	4	5	3	3
179	V	25.6	183	f	5	5	5	5	5	5	5	5	5	5	5	6	6	5	5	5	5	5	5	5
182	K	25	163	f	6	6	6	6	6	6	6	6	6	6	6	6	6	6	6	6	6	6	6	6
183	K	19	84.6	m	3	3	3	3	3	3	3	3	3	3	3	3	3	3	3	3	3	3	3	3
185	C	28.1	230	m	3	3	3	3	3	3	3	3	3	3	3	3	3	3	3	3	3	3	3	3
187	V	26.8	219	m	4	4	4	4	4	4	4	4	4	4	4	4	4	4	4	4	4	4	4	4
194	CV	27.4	245	f	5	5	5	5	5	5	5	5	3	3	5	6	6	6	6	6	6	6	6	6
196	K	25	173	m	1	1	1	1	1	1	1	1	1	1	1	1	1	1	1	1	1	1	1	1

## Sheet: obs 3
ID	Treatment	Length	Weight	Sex	B-10	B-9	B-8	B-7	B-6	B-5	B-4	B-3	B-2	B-1	B+1	B+2	B+3	B+4	B+5	B+6	B+7	B+8	B+9	B+10
2	CV	21.3	92.5	f	2	2	2	2	2	2	2	2	2	2	6	6	6	6	6	6	6	6	6	6
3	CV	20.9	88.5	m	1	1	1	1	1	1	1	1	1	1	1	1	1	1	1	1	1	1	1	1
7	V	17.3	59.6	f	4	4	4	3	3	1	3	3	2	2	2	2	2	2	2	2	2	2	2	2
9	C	19.5	73	m	2	2	2	2	2	2	2	2	2	2	2	2	2	2	2	2	2	2	2	2
14	V	20.5	96.8	m	6	1	1	1	1	5	5	5	5	5	3	3	3	3	5	6	6	6	6	6
15	V	21.1	104.8	m	4	2	2	2	4	1	1	4	4	4	6	6	6	6	4	4	6	6	6	4
18	V	20.7	95.9	m	2	4	2	2	2	2	2	2	2	2	2	2	2	2	2	2	2	2	2	2
21	K	24.1	150.6		6	6	6	6	6	6	6	6	6	6	6	6	6	6	6	6	6	6	6	6
24	CV	22.2	124.8		5	1	6	6	5	3	1	1	6	5	5	5	3	6	3	4	6	6	6	6
25	C	20.3	95.5	m	2	3	5	3	1	3	3	1	2	2	1	1	5	5	4	6	6	6	1	2
28	C	20.4	98.6	f	4	4	4	4	4	4	4	6	6	6	4	4	4	4	4	6	4	4	4	4
30	CV	21.5	124	m	6	6	6	6	4	4	6	6	6	6	4	4	4	6	6	6	6	6	6	6
32	C	20	90.7	f	5	5	5	5	5	5	5	5	5	5	5	6	6	5	5	3	5	5	5	4
34	V	21.3	106	f	3	3	3	3	3	4	4	4	4	3	4	4	3	3	4	4	4	4	4	4
36	V	20.5	100.4	m	6	5	6	1	5	2	2	1	2	4	1	2	2	2	4	5	6	3	6	4
38	K	19.1	75.8	f	4	6	6	6	4	4	4	4	3	3	3	3	3	3	3	3	3	3	3	3
40	V	18.4	73.1	m	2	2	2	2	2	2	2	2	2	2	2	2	2	2	2	2	2	3	4	4
41	CV	20.7	94.3	m	4	6	6	3	3	3	5	5	3	1	1	1	1	1	1	1	1	1	1	1
44	CV	19.5	80.7	m	6	6	6	6	6	6	6	6	6	6	6	6	6	6	6	6	6	6	6	6
46	K	19.6	80.2	f	6	5	4	1	4	2	2	2	4	4	4	6	6	6	6	6	6	6	6	4
48	V	19	74.5	m	1	1	1	1	1	1	1	1	1	1	3	4	6	6	6	6	5	5	5	5
50	C	17.9	63	m	6	6	6	6	6	6	6	6	6	6	6	6	6	6	3	3	3	3	3	3
51	C	17.8	59.4	m	1	1	1	1	1	1	1	1	1	1	1	1	1	1	1	1	1	1	1	1
54	CV	21.4	112.6	m	6	6	6	6	6	6	6	6	6	6	6	6	6	6	6	6	6	6	6	6
62	C	22.5	134.6	m	4	4	4	4	4	4	4	4	4	4	4	4	4	4	4	4	4	4	4	4
64	V	25.3	185.4	m	1	1	1	1	1	1	1	1	1	1	1	1	1	1	1	1	1	1	1	1
67	V	21.6	114.8	f	2	2	2	2	2	2	2	2	2	2	2	2	2	2	2	2	2	2	2	2
72	K	21.9	113.4	m	1	1	1	1	1	1	1	1	1	1	1	1	1	1	1	1	1	1	1	1
73	C	24.7	171.8	m	5	5	5	3	3	3	3	3	3	3	3	3	3	3	3	3	3	5	5	1
75	V	25	158.4	f	6	6	6	6	6	6	6	6	6	6	6	6	6	6	6	6	6	6	6	5
78	C	24.8	180.4	f	6	6	6	6	6	6	6	6	6	6	6	6	6	5	5	5	6	6	5	5
80	V	22.6	120.6	m	6	6	6	6	6	6	6	6	6	6	6	6	6	6	6	5	6	6	5	6
84	K	22.1	111.2	m	4	4	4	4	4	3	3	3	3	3	2	2	2	2	2	1	1	1	1	3
86	K	25.2	180.6	f	1	1	1	1	1	1	1	1	1	1	1	1	1	1	1	1	1	1	1	1
88	C	24.5	163.6	m	1	1	1	1	1	1	1	1	1	1	1	5	5	5	3	1	1	1	1	1
90	C	24.1	165	m	3	3	3	3	3	3	3	3	3	3	1	1	1	1	1	1	1	1	1	1
92	V	22.1	113.8	f	6	6	6	6	5	3	6	6	6	6	4	4	4	4	4	4	4	4	4	4
94	V	20.5	94.6	f	3	3	6	1	1	3	3	3	3	3	3	3	3	3	3	3	3	3	3	3
96	K	21.7	130.2	m	3	4	4	2	5	5	5	5	5	5	5	5	5	6	6	6	6	6	6	6
98	K	18.9	86.9	m	1	1	1	1	1	1	1	1	1	1	2	1	1	1	1	1	6	1	1	1
100	C	23	137.2	f	1	1	3	3	1	3	1	4	6	6	6	1	1	2	5	6	4	6	6	3
102	CV	24.9	167.8	f	6	5	5	5	6	6	6	6	6	6	6	6	6	6	5	6	6	6	6	6
103	K	27.9	230.97	f	3	3	3	4	6	1	1	1	3	3	4	3	1	1	3	4	6	5	2	2
106	CV	24.3	145.5	m	3	3	3	3	3	3	3	3	6	6	3	3	3	3	4	3	3	3	3	4
108	K	25.8	184	m	1	1	1	1	1	1	1	1	1	1	1	1	1	1	1	1	1	1	1	1
110	CV	22.6	131.6	m	2	2	2	2	2	2	2	2	2	2	2	2	2	2	2	2	2	2	2	2
113	C	22.9	129.4	m	4	4	4	4	4	4	4	4	4	4	4	4	4	4	4	4	4	4	4	4
116	CV	24.5	154.6	m	6	6	6	6	6	6	6	6	6	6	6	6	6	6	6	6	6	6	6	6
117	CV	23.9	151.2	f	2	2	2	2	2	2	2	2	2	2	6	6	6	6	6	6	6	6	6	6
120	CV	24.2	161.8	m	6	6	6	6	6	6	6	6	6	5	5	6	6	6	6	6	6	6	6	6
122	K	26.6	200.6	f	1	1	1	1	1	1	1	1	1	1	1	1	1	1	1	1	5	1	1	1
123	C	23.2	133.6	f	5	5	3	5	5	3	4	4	6	6	4	6	6	6	5	4	6	6	4	6
125	K	25.6	192	m	5	3	4	4	4	4	4	4	4	4	4	4	4	4	4	4	4	4	4	4
127	V	22.9	120.2	m	6	6	6	6	3	4	5	5	6	6	6	6	6	6	6	6	6	6	6	6
130	V	21.4	94.7	f	3	3	3	3	3	3	3	3	3	3	3	3	3	3	3	3	3	3	3	3
131	C	27.3	237.8	f	6	6	6	6	6	6	6	3	1	1	1	1	1	1	2	1	1	2	3	3
133	C	21.7	107.5	m	6	6	6	6	6	6	4	6	6	6	4	4	4	4	4	4	6	6	6	6
136	V	25.7	166.2	f	4	4	4	4	4	4	4	4	4	4	4	4	4	4	4	4	4	4	4	4
137	CV	24.6	142.2	m	4	3	3	4	4	1	4	4	4	4	4	4	4	4	6	6	4	6	6	6
142	V	27.2	192.14	f	3	5	3	3	3	3	3	3	5	5	5	4	6	4	4	6	6	5	6	4
143	K	25.9	168.25	m	6	3	5	3	3	3	6	6	6	6	6	6	6	4	3	6	6	6	3	2
145	K	26.6	208.23	f	4	4	4	4	4	4	4	4	4	4	3	4	4	3	4	5	3	5	5	5
147	CV	25	188.27	m	1	1	1	1	1	1	1	1	1	1	1	1	1	1	1	1	1	1	1	1
150	CV	25.8	173.46	f	2	4	4	4	4	4	4	4	4	4	4	4	3	2	2	2	2	2	2	2
153	C	25.3	185.27	f	4	6	4	4	4	4	4	6	6	4	4	4	4	4	4	4	4	4	2	2
156	CV	25.9	182.52	f	6	6	6	6	6	6	6	6	6	6	6	4	4	4	4	4	4	4	4	4
157	V	24.9	138.41	f	5	5	5	5	5	5	5	5	5	5	5	5	5	5	5	5	5	5	5	5
160	CV	26.4	189	f	4	4	4	4	4	4	4	4	4	4	4	6	6	6	6	4	4	4	4	4
162	K	24.6	164.17	f	6	6	6	6	6	6	6	5	5	5	4	4	4	4	4	6	6	5	5	5
164	C	25.8	186.4	m	4	4	4	4	4	4	4	4	4	4	4	4	4	3	3	3	3	3	3	3
166	V	28	244.68	m	3	3	3	3	3	3	3	3	3	3	3	3	3	3	6	6	6	6	6	6
168	K	25.6	183.73	m	4	4	4	4	4	4	4	4	4	6	6	6	6	6	6	6	6	6	6	6
170	C	26.2	193	m	6	6	6	5	5	5	5	5	3	3	3	5	6	6	6	6	4	6	6	5
172	CV	27.8	209	f	3	3	3	3	3	5	3	3	3	1	1	2	2	2	2	2	2	2	2	2
176	CV	24	136	f	1	1	1	1	1	1	1	1	1	1	1	1	1	1	1	1	1	1	1	1
177	V	25.4	175	f	4	4	2	2	4	4	3	3	3	3	3	4	4	4	4	4	4	4	4	4
179	V	25.6	183	f	3	1	1	1	1	1	1	1	1	1	1	1	1	1	1	1	1	3	1	1
182	K	25	163	f	4	4	4	4	4	4	4	4	4	4	4	5	3	5	5	5	5	5	3	3
183	K	19	84.6	m	3	5	3	3	3	3	3	3	3	3	3	3	3	3	3	3	3	5	5	5
185	C	28.1	230	m	2	2	2	2	2	2	2	2	2	2	2	3	3	3	3	3	3	3	3	3
187	V	26.8	219	m	6	6	6	6	6	6	6	6	6	6	6	6	6	6	6	6	6	6	6	6
194	CV	27.4	245	f	6	6	6	6	6	6	6	6	6	6	6	6	6	6	6	6	6	6	6	6
196	K	25	173	m	2	5	2	6	6	6	3	1	3	3	1	1	1	1	1	1	1	1	1	1
