# Supplementary material for: Sight or smell? Behavioural and heart rate responses in subordinate rainbow trout exposed to cues from dominant fish
Source: PeerJ. 2015 Aug 6;3:e1169. doi: 10.7717/peerj.1169 (PMC4558064; doi:10.7717/peerj.1169)
Supplement: Supplemental Information 3 [file peerj-03-1169-s003.xls]

## Sheet: Obs 1
ID	Treatment	Length	Weight	Sex	H-10	H-9	H-8	H-7	H-6	H-5	H-4	H-3	H-2	H-1	H+1	H+2	H+3	H+4	H+5	H+6	H+7	H+8	H+9	H+10	Before
14	V	20.5	96.8	m	41.0379	58.1505	45.2428	54.6685	54.8439	55.3744	60.8885	75.654	46.6244	55.2589	59.7532	49.134	63.0982	62.7424	53.2542	59.9557	56.0256	72.9838	50.5945	62.0415	58.76
41	CV	20.7	94.3	m	53.2592	42.0252	40.0024			41.8657	43.6268	43.0846	42.6834	46.9743	44.2191	41.9408	44.5725	36.0374	47.1874	43.5221	50.8287	48.5097	46.3778	47.8837	43.647
62	C	22.5	134.6	m	42.9477	41.8445	48.6755	44.5569	41.7347	44.8362	44.3098	44.5758	41.0284	50.2597	50.7593	51.1577	49.9454	47.6834	42.0697	42.661	42.5403	45.4163	44.7352	45.2159	45.002
67	V	21.6	114.8	f	58.4554	59.3316	57.9157	63.6777	56.9877	50.7279	73.3691	53.4126	46.1979	63.6984	49.9489	54.1013	52.789	43.4783	58.7664	56.46	55.0754	66.7201	55.2345	57.2126	57.4812
73	C	24.7	171.8	m	57.6423	53.5471	55.8262	45.79	43.9572	43.1784	60.3656	54.4645	51.669	58.8319	43.3692	53.9751	51.373	44.4545	50.5993	50.6139	41.2878	45.2824	49.9601	48.3365	53.7019
75	V	25	158.4	f	51.1697	59.4247	44.4936	45.6532	55.459	40.4413	57.7845	64.3163	51.4633	44.1647	64.9477	50.2664	46.8647	57.5749		39.4096	42.165	39.4267	44.3999	48.5117	51.634
78	C	24.8	180.4	f	44.7403	33.2706	45.1807	39.9722	44.3046	44.1671	47.4981	42.9982	47.693	56.6783	46.8522	54.2068	51.9992	51.4961	45.5127	47.1072	53.1235	50.1432	46.9687	37.9492	47.8069
80	V	22.6	120.6	m	43.0465	42.8862	42.8384	40.2205	41.7763	40.5776	47.2877	41.758	40.21	39.198	41.6331	47.1526	55.1517	50.6218	44.7756	49.6499	42.9529	43.345	45.426	51.6385	41.8063
84	K	22.1	111.2	m	59.6479	59.6375	71.1423	52.9511	51.2249	48.1557	61	62.7224	56.4985	52.0381	54.1301	59.1419	59.3552	48.5179	52.2513	53.0412	57.3568	57.5283	50.0334	48.6365	56.0829
86	K	25.2	180.6	f	46.7143	45.1734	52.9103	57.3337	50.3293	48.1345	56.1475	58.8619	40.9823	46.4676	61.5743	43.9548	63.2377	58.202	57.0619	49.0478	61.6076	56.0792	64.3198	61.6584	50.1188
88	C	24.5	163.6	m	57.691	46.7491	43.477		44.5481	54.9677	47.5008	41.6186	40.1774	41.7097	42.9109	50.2561	46.0019	59.2712	50.0151	61.5134	49.6964	49.6958	46.8555	46.4008	45.1948
92	V	22.1	113.8	f	68.7719	64.923	65.1746	68.394	61.5115	61.1624	70.0391	71.3168	61.4687				76.4289	70.9583	72.0364	73.005	77.6125	80.8711	74.0135	73.1112	52.7974
94	V	20.5	94.6	f	52.3377	48.0179	53.0819	55.8107	40.8082	46.3252	45.2645	42.9453	58.6961	53.149	46.0951	53.3377	47.6471	66.6027	53.4041	35.4364	53.3577	42.6954	46.8586	47.2117	49.276
96	K	21.7	130.2	m	47.3871	43.7118	53.9259	67.8034	57.3486	49.2357	53.1031	65.7362	56.8758	70.1724	43.7917	50.736	53.7122	53.3715	65.5697	44.5372	63.8182	44.4685	48.4936	54.7921	59.0246
98	K	18.9	86.9	m	48.3154	59.5427	45.6293	46.5765	54.0137	49.6004	56.5576	54.3513	62.6152	42.4532	48.8807	46.8538	41.3539	46.6965	52.0065	43.7916	45.8292		49.9666	49.4011	53.1155
100	C	23	137.2	f	53.414	56.0352	57.8258	49.1822	47.6753	50.6446	49.5221	40.4399	42.9178	43.4196	52.5183	50.5131	55.0315	50.3592	58.0068	51.9662	37.9037	52.7118	48.0695	48.2242	45.3888
102	CV	24.9	167.8	f	45.6713	45.601	53.4968	47.5967	45.6076	50.1175		48.0344	48.8299	41.5289	46.1219	45.0455		49.9563	41.9265	39.7097	33.6652	40.3482	50.9488	35.988	37.7021
103	K	27.9	230.97	f	37.1744	34.9888	36.1105	35.1094	38.083	34.021	36.6389	42.3381	29.9196	36.7523	43.8158	39.3515	35.9932	37.0604	35.4731	35.3698	34.5448	35.1781	44.5735	38.2205	35.934
108	K	25.8	184	m	55.2243	55.8638	62.0649	64.1205	63.3146	64.2086	49.8334	68.1696	60.3568	57.4085	51.275	59.4168	55.2161	61.1216	64.9411	63.1446	45.7113	61.2245	53.6461	67.0811	59.9954
110	CV	22.6	131.6	m	64.9985	51.9159	56.3878	48.4294	53.4385	59.4729	49.6947	48.1711	46.2818	48.6704	36.7761	38.4808	39.5119	43.2527	43.8331	35.3921	41.4247	32.6262	47.6477	43.7589	50.4582
113	C	22.9	129.4	m	48.96	56.4574	39.0831	51.397	54.8767	55.4438	37.533	59.3911	50.0705	44.8524	56.1256	50.9754	44.0281	49.4883	53.6966	51.913	53.0981	63.0524	69.5782	56.164	49.4582
116	CV	24.5	154.6	m	48.0364	31.2282	36.6019	32.6745	40.7128		47.7135	35.027	39.6866	38.4288	23.7459	37.4032	51.8742	43.087	46.9691	30.6573	59.6676	77.0153	61.9172	51.3281	32.1712
117	CV	23.9	151.2	f	42.9944	48.3253	46.856	37.9475	43.3504	50.7298	44.9706	45.4537	49.4699	39.3289	40.4174	41.15	42.4558	42.4725	46.9089	41.6515	40.4506	32.4502	37.8522	40.848	45.9906
120	CV	24.2	161.8	m	51.2057	52.0115	47.557	59.0376	58.6761	58.1382	56.3913	58.8739	49.0801	53.9381	47.6012	49.6403	49.0129	50.9882	47.285	40.8429	48.9007	49.9101	50.4863	56.6371	55.2843
122	K	26.6	200.6	f	50.0569	47.1924	51.229	51.0604	45.5854	50.7375	59.8633	45.7443	50.584	50.74	53.358	55.9006	67.4637	61.3571	55.4798	47.0736	49.4928	46.5842	44.5743	50.2803	51.5338
123	C	23.2	133.6	f	63.245	56.6205	52.4999	44.4839	35.6907	36.7719	51.5237	41.5231	45.2334	41.7608	52.5302	50.4403	32.755	41.2157	50.018	63.6112	56.0215	50.1776	44.9962	57.288	43.3626
125	K	25.6	192	m	52.9985	52.1382	55.3199	54.5235	51.6892	54.7366	50.4367	58.6876	51.8437	64.9532	42.4306	52.6166	53.618	48.4533	56.1565	49.0399	56.7883	47.5143	45.5641	43.1403	56.1316
131	C	27.3	237.8	f	46.9636	47.5768	47.6453	46.5704	43.7233	45.5718	46.3108	30.2093	35.0455	38.6165	32.2528	48.4345	45.5988	47.9834	48.4118	41.2581	43.2779	36.5797	42.8375	38.3554	39.1508
136	V	25.7	166.2	f		61.6142	45.1347	50.6077	56.3935	52.5163	47.266	48.5171	48.7912	63.0422		64.7013	49.1888	58.827	63.716	66.0179	51.6414	59.3692	48.5369	38.7334	52.0266
137	CV	24.6	142.2	m	50.3131	51.0598	57.8257		44.8074	53.1473	48.0039	40.6487	52.6129	52.9165	40.7443	41.9822	38.4597	39.9438	43.3489	56.2699	40.5087	40.3076	34.4717	39.9545	49.4659
143	K	25.9	168.25	m	44.5654	42.4541	44.392	42.0445	42.4861	39.6617	37.9245	51.5278	41.7837	50.9318	36.7782	38.0704	46.2293	43.7297	44.7698	39.8825	43.039	39.4429	35.7216	52.9253	44.3659
147	CV	25	188.27	m	46.0841	54.748		47.376	43.8441	55.9266	54.9844	54.1752	46.8557	42.661		60.4896	48.1361	77.8354	54.3763	47.2961	62.6965	61.037	53.1163	58.1551	50.9206
153	C	25.3	185.27	f	38.6215	48.3661	48.7728	42.4086	61.0947	54.4916	45.678	38.6278	40.6346	35.3833	45.6953	40.1823	47.802	47.7033	55.7916	48.0413	48.1646	42.6619	38.6349	42.6213	42.9631
157	V	24.9	138.41	f	59.5441	53.1281	53.7919	47.6008	48.6452		49.0677	49.4152	40.0485	54.1159	48.8581	63.6373	45.0834	43.7933	58.2444	43.0376	53.6544	35.3195	53.4423	44.1597	38.5295
160	CV	26.4	189	f	52.1776	48.1469	47.6891		47.0325	53.8399	46.3086	53.8261	47.8838	47.1447	43.0806	51.3069	58.4253		56.627	65.0991	35.0567	50.9813	42.3443	49.8357	49.8006
164	C	25.8	186.4	m	50.1363	53.2511	36.9232	46.151	45.7289	54.7723	52.9223		58.0613	53.2706	47.0097	50.8974	65.6235	44.133	49.4918	40.5631	43.5934	56.9985	57.514	38.6843	43.8053
166	V	28	244.68	m	50.4935	48.8799	49.3904	50.7684	49.3384	47.176	47.5959	48.6846	43.4867	39.5942	42.7721	49.2398	54.8097	51.9536	58.482	57.6437	53.5394	46.3923	57.2588	56.1547	45.3075
172	CV	27.8	209	f	57.2084	56.7522	53.9984	62.7513	40.7272	52.8973	67.0126	57.1435	43.9738	66.23	48.2486	30.3832	35.6871	55.5255	36.1962	52.6487	48.6885	63.8244	52.8814	47.7915	57.4514
183	K	19	84.6	m	50.1019	49.5653	54.3781	54.8839	59.3484	50.8143	41.1349	41.4016	46.9117	53.7708	44.2357	58.5963	67.4148	30.3257	53.7898	51.455	64.576	39.4448	41.4632	51.2975	46.8067
185	C	28.1	230	m	36.386	42.6884	38.3151	46.8646	43.8766	40.8554	35.9337	38.692	40.761	37.9336	31.4315		44.7894	43.1075	53.0685	46.3161	45.4989	31.2985	38.406	48.0332	38.8351
187	V	26.8	219	m	59.749	56.0681	61.1932	57.888	57.0793	47.2088	62.7229	61.7435	56.6085	38.7424		60.0502	56.0324	45.5674	61.6135	59.9954	53.9686	57.3896	62.2672	59.1543	53.4052
194	CV	27.4	245	f	53.2396	52.0724	57.3984	53.7328	59.603	54.8162	63.0959	43.6742	44.884	59.4633	45.8826	54.5949	57.4004	53.2108	51.5147	68.0664	51.4476	61.0057	56.4718	47.1501	53.1867

## Sheet: Obs 2
ID	Treatment	Length	Weight	Sex	H-10	H-9	H-8	H-7	H-6	H-5	H-4	H-3	H-2	H-1	H+1	H+2	H+3	H+4	H+5	H+6	H+7	H+8	H+9	H+10	Before
14	V	20.5	96.8	m	59.5625	65.1985	55.1001	58.9374	45.0414	50.7615	71.9085	71.1339	46.6037	47.9271	57.335	49.309	57.062	67.1461	46.4399	47.9629	59.3564	62.691	63.0232	48.8159	57.6669
41	CV	20.7	94.3	m	37.518	38.665	38.1659	37.9325	61.9504	47.8019	40.3622	43.8504	36.5196	30.7838	43.1203	47.7058	50.0154	48.2956	45.1027	46.815	43.2677	34.9836	52.6426	68.2123	39.8636
62	C	22.5	134.6	m	42.301	43.1242	48.8908	47.7585	47.6703	46.7524	47.163	49.0458	50.7016	42.6401	34.9047	42.6804	46.2121	43.9874	41.3266	47.6909	42.4255	45.0193	42.8756	43.1697	47.2606
67	V	21.6	114.8	f	56.6952	52.0387		55.9625	51.0176	45.4504	61.5668		62.7153	65.9582	47.101	57.485	54.5473		45.8213			58.1675	62.9845	47.5602	47.1381
73	C	24.7	171.8	m	47.8216	44.6731	51.1712	49.8928	40.6072		46.3137	49.9079	52.0577	42.3376	44.513	48.2901	47.265	57.0919	47.1578	43.7917	43.7664	41.123	43.9106	41.5954	38.1234
75	V	25	158.4	f	49.9848	44.5049	36.2235	48.9502	40.7588	55.2976	39.8279	49.0654	63.2368	39.817	40.1949	61.2472	55.6699	50.7313	56.1748	41.3272	59.7314	38.6996	47.055		49.4489
78	C	24.8	180.4	f	53.8278	42.4073	32.6299	36.4004	40.6539	39.0789	45.9448	35.6527	42.2507	43.4081	38.6554	37.7618	44.702	51.8617	40.2444	32.0197	46.6381	50.4517	46.2621	51.7826	41.267
80	V	22.6	120.6	m	37.436	47.3067	48.5009	37.3403	44.8701	37.5494	46.1478	46.1718	45.711	39.954	48.2098	42.3976	43.2195	41.9273	39.51	42.4345	50.8498	43.8162	39.6839	43.5724	43.1068
84	K	22.1	111.2	m			54.7672	44.4534	50.8192	65.2607	56.1827	65.0688	55.2264	46.1386	56.342	45.2022		47.9708	61.738	56.1232	63.8855	57.3317	66.015		57.5754
86	K	25.2	180.6	f	45.1785	67.4005	69.8499	57.9234	69.0495	74.0265	70.7254	64.6257	54.3276	66.4814		48.3445		60.5683	53.5029	58.4638	57.5073	61.7437	58.083	55.6706	66.0373
88	C	24.5	163.6	m	60.0286	55.2201	48.4649	48.3327	55.6343	51.5817	62.6434	44.6279	52.4243	54.0503	43.5274	48.4229	60.1951	52.629	50.493	42.2135	54.3538	60.7231	62.9055	53.827	53.0655
92	V	22.1	113.8	f	44.5292	39.9512	44.2077	32.2269	39.6494	52.9329	53.3623	54.9522	54.359	54.899	50.7746	50.3924	48.0423	50.4317	46.8882	42.0951	40.9783	44.9354	40.4434	43.1044	54.1011
94	V	20.5	94.6	f	60.3647	36.4187	53.9505	34.4155	43.3224	43.5288	48.5902			42.7556	48.0799	35.2997	49.9442	46.2617	40.9352	57.959	43.3852	51.1395	50.9325	54.8809	26.9749
96	K	21.7	130.2	m	57.3251	45.7077	54.5998	56.0307	54.2993	49.3648	49.1786	44.0615	48.247	38.277	55.0388	47.8258	54.8607	43.5013	61.438	57.097	55.5784	39.9885	47.6237	47.2196	45.8258
98	K	18.9	86.9	m	49.5149	37.9897	50.1024	43.6069	49.6231	47.6981	49.943	51.2544	49.7169	45.6737	43.199	45.2148	55.2166	51.4773	48.3375		51.2161	60.0383	50.4939	55.7065	48.8572
100	C	23	137.2	f	45.2791	49.8316	58.5353	58.235	49.1142	41.6504	42.2857	47.3771	40.6081	46.4836	55.778	46.3232	56.1124	44.3126	51.6707	39.8556	49.117	55.051	51.4728	42.1441	43.681
102	CV	24.9	167.8	f	42.6139	43.6058	37.5398		48.5431	41.1565	33.6784	57.8518	51.4128	48.6765	64.4613	42.2283		45.8659	42.0499	52.5112	48.1203	49.1332	44.6015	57.9469	46.5552
103	K	27.9	230.97	f	35.4001		34.2345	37.9889	38.6748	38.3883	43.9915	32.2027	53.6858	52.5211	34.2362	38.052	41.0245	37.4599	34.7133	37.3964	35.009	35.2275	33.216	37.6498	44.1579
108	K	25.8	184	m	43.5976	38.4354	42.51	44.2929	38.9624	42.6612	41.7837	47.8473	39.7485	51.7896	37.5232	41.0136	43.5538	40.4241	48.2093	47.7814	45.2211	46.7681	48.6025	54.8234	44.7661
110	CV	22.6	131.6	m		33.1683	47.7674	43.1307	40.6805	37.8746	36.3704	41.9299	38.4918	59.8603	46.7946	45.2485	37.799	49.0433	44.2931	46.2827	36.9514	44.0015		35.3021	42.9054
113	C	22.9	129.4	m	55.5319	60.2924	48.5546	37.178	47.9111	64.5226	54.5593	54.0073	53.8341	52.4414	45.0658	44.1781	39.5787		46.6121		46.5867	60.7601	48.3335	35.9631	55.8729
116	CV	24.5	154.6	m	34.063	39.0391	43.9657	39.789	40.0562	47.0299	33.7018	41.4575	45.9928	37.7568	32.9564	46.3804	41.2586	48.0202	36.7338	43.8481		39.4661	32.9049	35.6278	41.1878
117	CV	23.9	151.2	f	55.7583	53.1627		44.6265	55.0928	42.9635	45.3363	47.0638	33.7426	40.5513	41.3912	45.1931	50.2603	46.6126	48.9996	35.0542	40.8431	42.3638	49.9868	55.1598	41.9315
120	CV	24.2	161.8	m	43.0349	48.8698	47.6395	41.5558	43.0066	50.8392	42.6409	42.448	54.8713	46.8424	46.3603	50.8896	49.3994	52.7692	46.9302	47.5786	46.9262	50.8616	41.8242	44.1947	47.5284
122	K	26.6	200.6	f	64.8889	68.9621	59.0142	62.4133	58.3401	63.6257	62.6882	61.7874	63.918	61.8259	50.8405	61.083	63.8871	52.5626	58.9152	62.1971	57.7649	63.688	59.7279	53.8378	62.769
123	C	23.2	133.6	f	54.7509	45.7699	50.9505	36.9957	39.1032	47.9377	45.2494		49.719	34.8597	47.5338	42.4047	57.0172	48.0627	49.3336	52.1475	43.7863	36.7395	61.1237	54.3844	35.5532
125	K	25.6	192	m	69.0137	64.297	56.7016	75.6816	67.4332	59.6773	61.7539	62.4747	50.8556	64.2017	54.9575	65.2999	59.6684	59.2069	59.3462	60.2664	60.4466	51.7212	59.8138	58.3546	59.7926
131	C	27.3	237.8	f		38.5481	37.0013	41.3309	42.8987	35.1536	35.1611	30.2871	31.9927	34.3704	47.3168	38.674	31.907	29.289	30.0499	33.1403	27.7413	33.3163	29.5732	29.9733	33.393
136	V	25.7	166.2	f	48.877	58.6027	54.5359	55.0919	62.1284	50.9475	47.3418	32.5168	46.4806	58.6234	46.0104	58.3007	49.7918	49.7669	58.6474	51.3746	53.4904	54.2514	48.5547	44.7354	47.182
137	CV	24.6	142.2	m	44.6048	46.3846	50.0792	49.7349	42.5619	51.4224	54.5166	62.2672	68.9694		68.0639	64.5805	43.7404	47.5591	40.3167	40.3625	59.1887	52.2623	43.0916	51.3462	47.4351
143	K	25.9	168.25	m	53.1877	56.124	38.8618	32.2455	39.6336	38.6564	39.6184	35.0691	30.8384	36.7424	40.1651	29.0927	36.7443	40.7669	38.8563	39.9684	38.25	32.1502			36.1849
147	CV	25	188.27	m	49.5797	38.7509	48.4294	31.7503	48.3273	54.062	43.4694	60.4355	56.2523	47.0139	50.9311	57.5628	49.0675	51.4761	50.7176	48.0874	65.5917	42.8563	50.5112	56.6543	52.2466
153	C	25.3	185.27	f	39.6918	36.52	38.3499	51.2595	33.3601	50.9956	43.8565	36.4119	36.0242	36.3018	36.7337	34.7055	43.0249	49.243	34.6405	40.97	33.1611	32.1507	44.4197	42.435	40.718
157	V	24.9	138.41	f		35.6645	40.9183	31.7768	40.0087	42.2757	40.5883	37.6299	46.8131	44.9687	48.4955	43.3641	44.4209	39.5888	39.005	48.4166	48.1006	43.1699	34.2701	38.7741	42.4551
160	CV	26.4	189	f	52.9461	40.4836	40.1491	41.4253	50.8101	48.9224	41.678	39.4449	43.5018	43.7416	38.8254	44.0185	65.0945	62.7788	36.9499	54.8054	61.8363	44.6181	42.0308	57.3933	43.4577
164	C	25.8	186.4	m		46.5286	43.0273	49.5987	64.8981	47.9064	37.113		57.0136	37.7124	59.2555	47.1923	35.495	35.6047	41.9566	48.5306	45.0334	44.1597	40.3635	49.3277	35.9491
166	V	28	244.68	m	50.0556	55.0009	49.6641	51.2206	36.8702	48.5468	48.7241	50.4928	48.194	38.38	60.8775	57.9058	51.1132	53.7081	48.1701	41.8141	56.4871	46.0446	54.2312	52.5564	46.8675
172	CV	27.8	209	f	47.826	49.3608	37.6845		39.6056	38.0293	45.0172	46.7379	49.7309	39.9732	45.3484	41.9772	40.9619	30.1764	36.6806	37.4253	42.6071	44.4489	33.4143	44.6083	43.8977
183	K	19	84.6	m	35.2023	50.2935	31.3961	32.6658	42.1663	30.3691	43.3692	48.8298	31.2882	42.0138	47.56	34.765	41.2461	47.4573	47.2398	44.1634	47.707	41.2211	42.4777	32.609	39.174
185	C	28.1	230	m	38.7382	35.0106	38.6164	30.9039	33.5337	41.1279	36.5814	40.0957	45.3319	35.7417	33.8083	39.3303	42.6036	41.5853	33.0387	31.9788	34.9343	40.6193	35.1404	35.2247	39.7757
187	V	26.8	219	m	44.2304	54.9455	47.1719	46.9155	47.6552	62.9441	60.4707	52.6943	60.6381	60.1297	40.1305	50.2309	52.9019	61.8911	62.4377	52.6671	68.4788	46.9828	49.5785	49.8164	59.3754
194	CV	27.4	245	f	60.7937	55.4217	53.4937	55.6571	56.5346	62.3358	63.5577	57.124	56.7303	67.3716	58.3193	57.4913	45.3101	62.8772	61.16	63.8129	63.1157	64.1046	64.7142	59.0997	61.4239

## Sheet: Obs 3
ID	Treatment	Length	Weight	Sex	H-10	H-9	H-8	H-7	H-6	H-5	H-4	H-3	H-2	H-1	H+1	H+2	H+3	H+4	H+5	H+6	H+7	H+8	H+9	H+10	Before
14	V	20.5	96.8	m		56.0528	48.084	49.3306	56.5543	58.4512	55.1915	48.7992	59.8335	58.4766	58.4658	59.8364	48.9422	58.642	62.6132	56.1245	43.4177	52.5692	46.1357	49.2608	56.1504
41	CV	20.7	94.3	m	43.6584	38.3631	52.7014	42.9087	47.9858	46.8891	44.5832	55.6608	49.0398	51.1982	31.6056	42.8067	45.2037	47.9888	44.8657	37.489	46.102	45.8755	58.4992	40.1907	49.4742
62	C	22.5	134.6	m	42.5291	46.0586	46.6231	46.7386	46.5777	44.7002	38.3189	45.4141	40.9179	34.2456	36.0035	45.6159	41.707	40.1002	41.6089	39.5231	40.6508	39.5496	43.0789	41.5415	40.7193
67	V	21.6	114.8	f		46.1027	49.7261	56.1653	53.5827	62.1202	52.0357	49.5164	64.3755	54.8607	50.8972	55.4424		46.4893	44.8574	51.7894		47.8889	48.9653	52.7393	56.5817
73	C	24.7	171.8	m	50.4956	44.7769	47.9506	57.2246	47.9112	48.851	38.489	50.5091	45.3116	52.76	41.9186	51.9422	52.4764	47.5105	44.152	47.3488	45.503	50.5131	51.0179	51.4845	47.1841
75	V	25	158.4	f	61.6269	57.9791	45.5658	45.6293	34.0332	44.9444	45.4993	45.6094	64.6161	35.8852	48.3699	50.9233	58.2378	48.497	32.3685	40.8233	51.5484	54.7622	46.3073	57.1304	47.3109
78	C	24.8	180.4	f	37.2977	51.6319	43.002	44.973	53.4926	43.8962	41.7731	32.63	35.8781	48.3964	51.2692	51.2503	46.3977		45.6749	38.246	31.0823	41.7901	45.6599	57.1359	40.5148
80	V	22.6	120.6	m	41.1829	41.0291	40.4695	44.0764	41.0681	38.3865	44.9915	43.4954	44.1382	42.1518	38.3024	48.2081	45.8836	47.1929	56.8337	51.7382	50.0853	53.5966	52.2173	60.234	42.6327
84	K	22.1	111.2	m	55.9873	56.3966	46.9388	53.6744	63.9262	53.016	49.8609	43.5737	46.2054	49.3375	47.643	57.6559	49.3147	43.8222	47.5875	54.9833	53.0528	45.6193	47.2438	48.9326	48.3987
86	K	25.2	180.6	f		55.5941	56.3775	44.3713	45.1975	40.8462		50.6349	58.162	49.4612	42.7975	50.4639	58.1764	54.8925	54.758	51.5887	50.3112	48.3574	49.0131	48.8949	39.8209
88	C	24.5	163.6	m	48.3898	45.3583	43.7784	52.2701	37.592	48.9523	42.1838	47.4281	42.4915	42.0539	25.7354	47.0387	56.0058	48.0038	54.5072	49.4853	56.3663	58.7897	62.9982	45.3105	44.6219
92	V	22.1	113.8	f	50.3393	47.4583	39.6861	55.0398	44.9497	55.6285	59.4824	50.8353	42.8592	52.7715	59.2411	59.7145	60.4105	42.5793	59.4574	51.2411	49.8317	48.5269	57.3766	51.9461	52.3154
94	V	20.5	94.6	f	30.7763	42.0052	48.2623	49.2924	48.1571	46.8172	39.1335	40.5347	44.2231	42.78	47.6379	47.1788	47.4215	51.1518	46.844	46.4298	45.2537	38.9079	38.3501	43.6759	42.6977
96	K	21.7	130.2	m	56.2324	46.8994	58.8168	62.4994	51.3465	50.7022	53.3343	55.5076	57.8208	50.7631	58.0837	52.334	48.8911	60.7804	50.8696	51.3543	47.3923	44.3973	56.1039	53.6916	53.6256
98	K	18.9	86.9	m	43.3226	57.6099	61.8684	51.9461	58.5359	49.6706	53.8979	52.9303	58.5259	49.3432	44.5284	56.7747	41.2794	65.4192	48.6128	42.6117	36.7968	39.1343	58.6936	51.825	52.8736
100	C	23	137.2	f	56.8217	54.3246	64.4148	46.4784	47.0524	49.2934	68.3323	48.9009	49.3601	47.1536	43.9632	50.361	47.3666	41.0744	39.5019	48.1353	42.8427	41.8946	45.94	52.6141	52.6081
102	CV	24.9	167.8	f	63.3111	57.1229	44.4701	43.4295	44.1219	62.0283	42.2408	42.112	46.845	52.5525	54.6442	62.3534	50.8885	42.1841	66.3696	55.9997	49.9214	55.8851	51.2612	51.6089	49.1557
103	K	27.9	230.97	f	38.766	37.4587	32.5878	37.0384	47.0744	39.6503	42.9187	32.3914	47.8722	40.9972	46.0901	42.7936	45.0959		39.6321	40.1211	38.8187	35.2136	32.4261	46.1901	40.766
108	K	25.8	184	m	37.8047	44.6483	46.8522	39.6602	42.5416	41.5846	44.0336	32.8278	44.5384	45.5946	40.4619	41.6004	49.4248	39.137	43.3464	54.1968	55.9485	49.9307	48.1568	47.5079	41.7158
110	CV	22.6	131.6	m	45.5073	41.1591	39.1327	41.8558	29.7116	37.4211	43.7552	32.4179	39.2393	30.193		42.6292	39.0607	39.3925		42.6206	33.3795	38.2956	33.3776	40.7825	36.6053
113	C	22.9	129.4	m	50.1306	55.3482	62.3911	60.3595	46.2483	54.5228	44.41	62.9547	42.8707	66.8647	55.3698	48.0073	59.9879	54.5696	51.6973	39.0015	40.9615	48.0433	66.9929	51.8294	54.3246
116	CV	24.5	154.6	m	33.7488	46.0744	39.5375	32.328	36.4416	30.1702	27.0619	27.5597	30.9359	32.8721	36.3078	33.3276	33.3902	36.2638	32.5009	33.5758	37.2174	32.4403	33.3962	32.0198	29.72
117	CV	23.9	151.2	f	44.7183	47.0085	42.0728	39.3307	44.8368	43.398	40.9256	35.9745	53.7844	41.1484	44.0494	40.1857	40.3741	49.4098	37.0748	32.7458	41.2868	45.4186	46.3485	48.5563	43.0462
120	CV	24.2	161.8	m	46.8056	44.5392	44.343	40.9488	41.6786	54.404	48.3931	42.2359	45.704	58.1036	55.3102	50.9727	47.1605	41.869	51.5152	46.0739	49.857	51.1341	49.3014	46.539	49.7681
122	K	26.6	200.6	f	44.7228			40.3845	53.7447	48.0338	43.1554	37.0182	46.5861	44.6912	46.0845	45.3916	31.3041	48.4261		35.8444	47.0377	36.6006	39.2705	45.1932	43.8969
123	C	23.2	133.6	f	53.1181	60.6346	46.6692	33.8909	40.125	47.3331	46.3662	45.8189	39.2362	41.7229	58.3251	32.5669	35.2286	32.7931	29.6469	35.2982	46.5655	39.8923	46.7375	46.7726	44.0955
125	K	25.6	192	m	50.7319	54.0154	53.7486	58.0021	50.7641	50.0255	52.4595	42.3948	42.2206	55.9287	59.0165	62.8906	60.9065	54.8925	48.6055	56.6304	55.8542	54.0963	44.1844	49.5619	48.6058
131	C	27.3	237.8	f	36.6732	37.9435	34.8881	29.9669	33.9167	40.0263	33.0186	44.501	54.5191	41.7789	38.4093	45.5308	43.1366	50.1767	41.5876	36.8666	41.0035	43.9708	46.0135	46.2052	42.7688
136	V	25.7	166.2	f	58.8525	46.2323	55.9627	55.8677	63.0002	47.05	44.9464	48.9801	54.3286	52.14	47.5503	58.2772		51.19	45.3068	51.6711	53.0817	45.8778	46.837	63.229	49.489
137	CV	24.6	142.2	m	64.5951	62.654		66.8445	42.63	66.9266	45.7845	42.0557	49.4156	51.8689	61.1291	56.1461	55.8182	52.9052	68.5329	60.3162	61.4045	48.9754	56.8606	69.5219	51.2103
143	K	25.9	168.25	m	39.5735	30.5214		39.7998	35.4956	35.0876	45.8642	29.9423	38.841	44.8363	46.744	34.03	36.5495	45.8977	46.5458	28.5756	30.1459	39.3873	41.8688	55.6903	38.9143
147	CV	25	188.27	m	48.1513	59.8372	64.7732	51.6806	49.4195	45.7151		64.7119	55.9497	48.4267	48.8164	41.0714	54.4784	69.3587	46.4482	52.3503	53.2059	55.2145	64.8487	68.0131	42.9607
153	C	25.3	185.27	f	55.3169	49.1929	61.3884	50.7514	45.4099	41.187	51.4601	52.1578	46.3587	49.4302	42.8919	55.3353	51.3917	47.0474	46.6505	46.3656	50.0997	57.0016	42.0674	43.7227	48.1188
157	V	24.9	138.41	f		43.5342	41.5047	43.3522	37.3764	41.0278	38.2686	45.5227	36.9807	37.1758	45.0155	42.4794	51.4282	51.3276	46.1108	34.4373			37.1846	44.2721	39.7951
160	CV	26.4	189	f	44.965	35.0604		34.107	31.4245	34.5348	50.1778	46.9613	37.5294	35.2718	43.8103	50.0735	52.967	43.3072	53.3179	44.4206	45.0885	32.6774	44.6873	34.7339	40.895
164	C	25.8	186.4	m	36.4121	41.4064	54.5605	48.9504	39.5756	51.0848	43.198	43.751	44.1475	37.2785	29.5864	43.1979	43.6577	39.0647	42.361	43.5123	45.0449	42.1991	35.8164	37.52	43.892
166	V	28	244.68	m	44.394	47.5435	45.4283	39.7726	43.2973	48.8775	47.0801	48.1033	45.0415	44.8223	38.4596	38.7773	44.9747	39.7419	48.1887	54.1201	57.5025	50.9544		52.2522	46.7849
172	CV	27.8	209	f	43.7645	49.9556	33.9283	49.8529	33.6719	39.2626	56.3544	56.7081	46.1559	44.1131	53.9697	46.4582	47.053	57.7791	56.6462	44.4629	54.9539	48.7335	33.8216	49.8945	48.5188
183	K	19	84.6	m	46.2205	46.7597	40.4993	44.8836	44.8461	44.6084	45.2951	45.2657	47.309	44.0949	47.4348	42.0364	44.2979	47.4654	41.7288	36.7026	48.7911	50.198		45.3816	45.3146
185	C	28.1	230	m				35.0479	31.7711	40.7741	44.7215	29.2295	30.9789	38.2271	48.2519	31.2759	50.593	47.0348	39.7088	49.052	36.7928	45.3805	37.3172	30.3935	36.7862
187	V	26.8	219	m	46.4519	45.1459	53.4355	44.674	44.5773	51.6458	46.8767	44.6836	40.8085	47.8639	53.2791	50.4548	53.0163	51.8532		54.8312	49.6166	50.7174	46.8871	42.2525	46.3757
194	CV	27.4	245	f	49.9432	54.5951	55.3364	59.1895	54.3849	53.7551	57.8192	54.5572	49.1319	51.1325	48.176	53.3323	51.2213	56.1098	53.0711	50.2122	51.2044	52.9803	49.659	52.0795	53.2792
